# Supplementary material for: Strong Axiality in a Dysprosium(III) Bis(borolide) Complex Leads to Magnetic Blocking at 65 K
Source: PubMed Central journal article supplement (PMC9923674; doi:10.1021/jacs.2c08568), 2023-01-11
Supplement: ja2c08568_si_001.pdf [file ja2c08568_si_001.pdf]

Supporting Information for:

**Strong Axiality in a Dysprosium(III) Bis(borolide) Complex Leads to Magnetic Blocking at 65 K**

Alexandre Vincent<sup>a</sup>, Yasmin L. Whyatt<sup>b</sup>, Nicholas F. Chilton<sup>b\*</sup>, and Jeffrey R. Long<sup>a,c,d\*</sup>

<sup>a</sup> Department of Chemistry, University of California, Berkeley, California 94720, United States

<sup>b</sup> School of Chemistry, The University of Manchester, Oxford Road, Manchester M13 9PL

<sup>c</sup> Department of Chemical and Biomolecular Engineering, University of California, Berkeley, California 94720, United States

<sup>d</sup> Materials Sciences Division, Lawrence Berkeley National Laboratory, Berkeley, California 94720, United States

## Table of Contents

|                                                                                           |    |
|-------------------------------------------------------------------------------------------|----|
| <b>1. Experimental Methods</b>                                                            | 3  |
| 1.1. Material Preparation                                                                 | 3  |
| 1.2. Synthesis of [K(18-crown-6)][Dy(BC <sub>4</sub> Ph <sub>5</sub> ) <sub>2</sub> ] (1) | 3  |
| 1.3. Single Crystal X-Ray Diffraction Analysis                                            | 3  |
| 1.4. Inductively Coupled Plasma–Optical Emission Spectrometry                             | 4  |
| 1.5. Fourier Transform Infrared Spectroscopy                                              | 4  |
| 1.6. Magnetometry                                                                         | 4  |
| 1.7. Nuclear Magnetic Resonance Spectroscopy                                              |    |
| 1.8. Powder X-Ray Diffraction                                                             |    |
| <b>2. Computational Methods</b>                                                           | 5  |
| 2.1. Density Functional Theory (DFT) Calculations                                         | 5  |
| 2.2. CASSCF-SO Calculations                                                               | 5  |
| 2.3. Spin Dynamics Calculations                                                           | 6  |
| 2.4. Mode-Weighted Analysis                                                               | 6  |
| <b>3. Figures and Tables</b>                                                              | 7  |
| <b>4. References</b>                                                                      | 49 |

## 1. Experimental Methods

### 1.1. Material Preparation

All manipulations were carried out under an atmosphere of argon with rigorous exclusion of air and water using either standard Schlenk line techniques or a glovebox. Commercial reagents were used directly without further treatment unless otherwise noted. Anhydrous  $\text{DyCl}_3$  was purchased from Strem Chemicals. The ligand  $\text{K}_2\text{BC}_4\text{Ph}_5$  was synthesized from  $\text{PhBC}_4\text{Ph}_4$  and potassium metal strips following literature procedure.<sup>1</sup> The ligand precursor  $\text{PhBC}_4\text{Ph}_4$  was synthesized according to the literature method<sup>2</sup> from  $(\text{LiC}_2\text{Ph}_2)_2$  and dichlorophenylborane (synthesized according to the literature method<sup>3</sup> from  $1\text{M } \text{BCl}_3$  in heptane (Millipore-Sigma) and tetraphenyltin (Alfa-Aesar)). The reagent  $(\text{LiC}_2\text{Ph}_2)_2$  was synthesized from diphenylacetylene (Alfa-Aesar) and lithium metal strips according to the literature method.<sup>4</sup> Lithium and potassium metal pieces were flattened and cut into strips ( $\sim 20 \times 5 \times 2$  mm) prior to their addition to reaction mixtures. Tetrahydrofuran (THF), benzene, toluene, and diethyl ether were dried and degassed using a JC Meyer solvent purification system and stored under Argon over  $4 \text{ \AA}$  molecular sieves prior to use. A diethyl ether solution of 18-crown-6 was dried over  $4 \text{ \AA}$  sieves for three days prior to use. The diethyl ether was then removed under reduced pressure to furnish solid, anhydrous 18-crown-6.

**1.2. Synthesis of  $[\text{K}(18\text{-crown-6})][\text{Dy}(\text{BC}_4\text{Ph}_5)_2]$  (**1**).** In the glovebox, colorless anhydrous  $\text{DyCl}_3$  (30.5 mg, 0.113 mmol) and THF (10 mL) were added to a 20 mL scintillation vial equipped with a stir bar, and the slurry was stirred for several minutes. The resulting suspension was then added quickly to a 20 mL scintillation vial containing red  $\text{K}_2\text{BC}_4\text{Ph}_5$  powder (118 mg, 0.226 mmol, 2.00 equiv). The mixture was allowed to stir for 18 h at ambient temperature. Following the reaction, the mixture was centrifuged to separate the insoluble colorless solid, presumed to be mostly KCl with possible traces of unreacted  $\text{DyCl}_3$ . The solution was decanted into a separate scintillation vial. The solvent was removed from this solution under vacuum to yield a red solid residue and the residue was washed once with diethyl ether. A solution of 18-crown-6 (37 mg, 0.140 mmol) in THF (5 mL) was then added to the solid. The mixture was agitated until complete dissolution was achieved. The red color of the solution became more intense than it had been following centrifugation. The THF solvent was then removed under vacuum, and the resulting solid dark red residue was washed with diethyl ether (1 mL), and the resulting powder redissolved in THF (1 mL). This solution was layered beneath two volume equivalents of diethyl ether and left to recrystallize at room temperature. After standing for one day, dark red crystals of **1**·2THF had formed, which were suitable for single-crystal diffraction. Dry yield of **1**: 32.0 mg (21%). All attempts to obtain CHN analysis on both **1** and **1**·2THF failed. ICP-OES was used to establish compositional purity of **1**. Dy, K, B ICP-OES. Expected for  $\text{C}_{80}\text{H}_{74}\text{B}_2\text{DyKO}_6$ : 12.0% Dy, 2.89% K, 1.60% B; Found: 11.52% Dy, 3.05% K, 1.34% B. FT-IR neat: 405(w), 413(m), 420(m), 426(m), 440(w), 458(m), 464(m), 474(m), 479(m), 491(m), 499(m), 507(m), 527(m), 532(m), 542(m), 615(w), 646(m), 666(m), 699(s), 731(m), 768(m), 789(m), 834(m), 854(w), 867(w), 872(w), 884(w), 902(m), 926(w), 960(s), 979(w), 997(m), 1026(m), 1071(m), 1101(s), 1247(m), 1284(m), 1350(m), 1442(w), 1453(w), 1458(w), 1474(w), 1485(m), 1570(m), 1588(m), 2872(m), 2895(m).

### 1.3. Single Crystal X-Ray Diffraction Analysis

Crystals coated in Paratone-N oil were mounted onto MiTeGen  $10 \mu\text{m}$  loops and moved under an Oxford Cryosystems nitrogen cryostat. Crystals were found to be very sensitive to oxygen, even under Paratone-N oil, decomposing into colorless material after only a few minutes of sitting in oil under the microscope. The diffraction patterns were produced using synchrotron radiation at the Advanced Light Source; Beamline 12.2.1. Unit cell determination and spot integration was performed using Bruker AXS and SAINT.<sup>5</sup> Absorption corrections were applied to spot intensities using the SADABS package.<sup>6</sup> Structural solutions were obtained using the Intrinsic Phasing method as implemented in ShelXT.<sup>7</sup> Least Squares refinement as implemented in ShelXL was used to refine structural models against  $F^2$ .<sup>8</sup> Olex2 was used as a graphical front-end for structural

solution and refinement.<sup>9</sup> Boron positions were initially assigned by assigning all five ring atoms as carbon, allowing chemical occupancies of the five-membered ring atoms to vary, and then selecting the position with the lowest chemical occupancy value to assign as boron. During preliminary CIF validation, the Hirshfeld rigid-bond test<sup>10</sup> detected incorrectly modeled boron atoms, producing a B-level alert. This alert was no longer present when the B atoms were assigned correctly.

Two other level B alerts arose during final cif validation as follows.

[PLAT230 ALERT 2 B](#) Hirshfeld Test Diff for C025 --C029 . 7.4 s.u.

C025 and C029 correspond to meta and para carbon atoms on one of the phenyl rings of  $\text{BC}_4\text{Ph}_5^{2-}$ . These two atoms are likely disordered across two positions. Attempts to model this disorder using SPLIT+SAME commands resulted in an unstable refinement with wildly variable thermal displacement parameters and low chemical occupancy values for one of the disordered phenyl positions. This instability was unresponsive to restraints, and so the second disordered position was ultimately not modeled, given its apparent low chemical occupancy and the instability of its thermal displacement parameters.

[PLAT230 ALERT 2 B](#) Hirshfeld Test Diff for C02A --C02J . 11.6 s.u.

C02A and C02J correspond to meta and para carbon atoms on another one of the phenyl rings of  $\text{BC}_4\text{Ph}_5^{2-}$ . These two atoms are probably disordered across two positions. Attempts to model this disorder also resulted in an unstable refinement with wildly variable thermal displacement parameters and small chemical occupancy values for one of the disordered phenyl positions. Again, this instability was unresponsive to restraints. The second disordered position was not modeled, given its low chemical occupancy and the instability of its thermal displacement parameters.

#### 1.4. Inductively Coupled Plasma–Optical Emission Spectrometry

Inductively coupled plasma–optical emission spectrometry was performed on a Perkin Elmer ICP Optima 7000. Commercial standard solutions (1000 ppm in 5% nitric acid) were purchased from Inorganic Ventures. Calibration curves were constructed using five standard solutions, each containing Dy, B and K. The Dy, B, and K concentrations for each of the five standard solutions are as follows: 0.1 ppm, 1 ppm, 5 ppm, 10 ppm and 15 ppm. Each standard also contained 0.1 ppm Y as an internal standard. A blank solution only containing 0.1 ppm Y was also prepared to set the zero-point of the calibration curve. Samples were fully digested overnight with 2 mL of piranha solution prepared from analytical grade 30%  $\text{H}_2\text{O}_2$  (Millipore-Sigma) and reagent grade sulfuric acid (Fisher). It was found that digesting in acid without an oxidant failed to fully dissolve the boron containing organic material, leading to consistently low boron values. After adding the internal standard to the acid digest, the solution was diluted with 5% nitric acid to a nominal concentration of ~10 ppm prior to analysis. Calibration curves for all analytes had  $R^2 > 0.999$ .

#### 1.5. Fourier Transform Infrared Spectroscopy

The Fourier-transform infrared (FTIR) spectrum of **1** was collected inside of an  $\text{N}_2$  glovebox using neat crystalline powder and a Shimadzu IRSpirit FTIR spectrometer operating in ATR mode. Peaks were identified using the multiple peak fitting routine as implemented in Origin 2022.

#### 1.6. Magnetometry

All magnetic measurements were carried out on a Quantum Design MPMS-XL SQUID magnetometer. Under the conditions used for magnetic sample preparation (described below), at least partial desolvation of the potassium cation is likely. Thus, in order to avoid ambiguity regarding the bulk composition of the sample and the quantitative magnetic results, a sample of **1**·2THF was fully desolvated before sample preparation. A crystalline sample of **1**·2THF was dried under vacuum for a minimum of 30 min, mechanically ground, and 21.4 mg loaded into a quartz tube (inner diameter 5 mm outer diameter 7 mm), covered with a solid layer of eicosane

(56.8 mg), and flame sealed under vacuum. The eicosane was subsequently melted at 40 °C in order to restrain the sample (prevent crystallite torquing) and to improve thermal conductivity between the sample and the environment. A second magnetic sample was prepared using a freshly prepared (and recrystallized) sample of **1**·2THF held under dynamic vacuum for only a few seconds, with the goal of removing surface crystallization solvent while retaining coordinated THF. The crystals were then crushed to form a microcrystalline powder (sample mass was 12.6 mg) and the sample prepared as described above (eicosane mass used was 47.0 mg). Work up of dc susceptibility data collected for this sample assuming the molecular weight for **1**·2THF (see Figures S10 and S11) revealed that the magnitude of the  $\chi_M T$  product at 300 K is 17.7 emu·K/mol, larger than that determined for **1** (15.0 emu·K/mol) and predicted for a free Dy<sup>3+</sup> (14.17 emu·K/mol), which suggests overestimation of the sample mass and likely desolvation of the sample. Even still, a full suite of ac and dc relaxation data collected for this second sample are consistent with those obtained for **1** and serve to validate the data for the desolvated compound. Diamagnetic corrections were calculated using Pascal's constants,<sup>11</sup> and were applied to all reported magnetic susceptibility values unless otherwise noted.

To collect isothermal magnetization decay data, the samples were initially magnetized under an applied magnetic field of 7 T for 5 minutes and then the field set to zero, and magnetization measured for ca. 1600 s. However, we found there was a trapped field in the superconducting magnet, and magnetization decay curves at 64, 68 and 72 K fully equilibrated during the measurement time to a negative magnetization value. These negative equilibrium magnetization values were used to fit a Curie law  $M(T) = C/T$  with  $C = -0.00232$  emu K; this corresponds to a field of approximately -12 Oe. Decay data for 64 K and below were fit using eq S1,<sup>12</sup> where  $M_{eq}$  was fixed to  $M_{eq} = -0.00232/T$ ,  $M_0$  is the first measured data point (set as time zero),  $t$  is the time after the first measured point  $M_0$ ,  $\tau$  is the characteristic relaxation time, and  $\beta$  is a stretching parameter ( $0 < \beta \leq 1$ ).

$$M = M_{eq} + (M_0 - M_{eq})e^{-\left(\frac{t}{\tau}\right)^\beta} \quad (S1)$$

Frequency dependent in-phase ( $\chi'$ ) and out-of-phase ( $\chi''$ ) magnetic susceptibility data were collected between 72 and 112 K. The relaxation time for each temperature increment was extracted using the generalized Debye model (eqs S2 and S3) as implemented in *CC-FIT2*.<sup>13</sup> The relaxation times were then tabulated with those from the magnetization decay experiments and fit using *CCFIT2*.<sup>13</sup>

$$\chi'(\omega) = \chi_S + (\chi_T - \chi_S) \frac{1 + (\omega\tau)^{1-\alpha} \sin(\pi\alpha/2)}{1 + 2(\omega\tau)^{1-\alpha} \sin(\pi\alpha/2) + (\omega\tau)^{2-2\alpha}} \quad (S2)$$

$$\chi''(\omega) = (\chi_T - \chi_S) \frac{(\omega\tau)^{1-\alpha} \cos(\pi\alpha/2)}{1 + 2(\omega\tau)^{1-\alpha} \sin(\pi\alpha/2) + (\omega\tau)^{2-2\alpha}} \quad (S3)$$

## 1.7. Nuclear Magnetic Resonance Spectroscopy

Proton NMR spectra and proton decoupled <sup>13</sup>C NMR spectra were collected at the UC Berkeley College of Chemistry NMR Facility on a Bruker Advance 400 MHz spectrometer operating at 9.4 T under ambient temperature. Samples were sealed under an atmosphere of Ar prior to measurement. Tetrahydrofuran-d<sub>8</sub> (99.8%) was purchased from Sigma-Adrich, saturated with argon using three freeze-pump-thaw cycles, and dried for 72 hrs over 3 Å molecular sieves prior to use.

## 1.8. Powder X-Ray Diffraction

A microcrystalline powder sample of **1** was loaded into a 1.0-mm borosilicate capillary inside a glovebox under an argon atmosphere. The capillary was subsequently flame sealed under Ar prior to measurement. High-resolution synchrotron X-ray powder diffraction data was collected at Beamline 17-BM at the Advanced Photon Source at Argonne National Laboratory. The temperature of the capillary samples was maintained at 298 K during measurement using an Oxford Cryosystems Cryostream 800. Scattered intensity was measured by a PerkinElmer a-Si flat panel detector. The average wavelength of all measurements was 0.45236 Å.

## 2. Computational Methods

### 2.1. Density Functional Theory (DFT) Calculations

Geometry optimization of the crystal structure and normal mode calculations were performed in the gas-phase on the anion in **1**·2THF using the Gaussian 09d software,<sup>14</sup> with both PBE and PBE0 density functionals and Grimme's empirical dispersion correction. Dysprosium was substituted for yttrium with an isotopic mass of 162.5 to aid self-consistent field (SCF) convergence, for which the Stuttgart RSC 1997 effective core potential (ECP) basis set was used for the 28 core electrons, with the remaining valence electrons being described by the corresponding valence basis set. The cc-pVTZ basis set was used for boron and carbon atoms, whilst the cc-pVDZ was applied for hydrogen atoms.<sup>14</sup> Geometry optimization and Löwdin population analysis<sup>15</sup> was also performed on the free ligands, as described in the main text, using the Gaussian 09d software employing the 6-31G\* basis set on all atoms.<sup>16</sup>

### 2.2. CASSCF-SO Calculations

The OpenMolcas<sup>17</sup> package was used to perform state-averaged complete active space self-consistent field spin-orbit (CASSCF-SO) calculations on the crystallographic and optimized structures of the anion, where the active space comprised nine 4f electrons in seven 4f orbitals of Dy<sup>III</sup>. Basis sets were taken from the ANO-RCC library,<sup>18</sup> where the Dy atom had VTZP quality, the five-membered heterocycle was modelled with VDZP quality, with all other atoms in VDZ quality. After CASSCF optimization, the states were mixed by spin-orbit coupling using the RASSI module and the electronic structures projected onto a crystal field Hamiltonian using SINGLE\_ANISO.<sup>19</sup>

### 2.3. Spin Dynamics Calculations

To reduce computational demand for spin dynamics calculations, we limited our CASSCF-SO calculations to the lowest 18 states of sextet multiplicity and used the atomic compact Cholesky decomposition (acCD) approach to fit the two-electron integrals. To check the validity of this approximation, we also calculated the electronic structure of **1-PBE** and **1-PBE0** at a higher level considering 21 sextets along with 244 quartets and 490 doublets in the CASSCF step, and 128 quartets and 130 doublets in the spin-orbit coupling step; we found only a trivial difference between the results (Tables S10–S14). Assuming the harmonic approximation, the maximum displacement along each mode at 100 K was calculated, and the optimized structure was then distorted along the normal mode coordinates. The CASSCF-SO calculations were then performed at four evenly spaced points in the positive and negative direction from the equilibrium position and crystal field parameters extracted. Following the most recently defined method,<sup>20</sup> we employed Bose-Einstein statistics and expanded the crystal field parameters in a Taylor series. Our approach herein differs only in the definition of zero-point displacement (ZPD), herein we define the ZPD as specified in ref.<sup>21</sup> by eq S4, where  $\hbar$  is the reduced Planck constant,  $\omega_j$  is the angular frequency, and  $\mu_j$  is the reduced mass of mode  $j$ .

$$Q_{j,0} = \sqrt{\frac{\hbar}{\omega_j \mu_j}} \quad (\text{S4})$$

#### 2.4. Mode-Weighted Analysis

We use the same methodology described in ref. <sup>20</sup> to decompose total gamma matrices into their mode-weighted components, where  $\langle \bar{H}_{\text{SP}} \rangle$  is the spin-phonon coupling,  $\langle \bar{Q} \rangle$  is the vibrational occupancy,  $\langle \bar{\rho} \rangle$  is the vibrational density of states and  $\langle \bar{n} \rangle$  is the effective number of modes. This enabled the switching of components between **1**,  $[\text{Cp}^{i\text{Pr}5}\text{Dy}^{\text{III}}\text{Cp}^*][\text{B}(\text{C}_6\text{F}_5)_4]$ ,<sup>22</sup> and  $[\text{Dy}(\text{Cp}^{i\text{Pr}4})_2][\text{B}(\text{C}_6\text{F}_5)_4]$ <sup>23</sup> to form fictitious total rate matrices which were diagonalized to give fictitious relaxation times. By comparing the fictitious relaxation times to the experimental relaxation times, we were able to elucidate the factors that most substantially contribute to the differences in the relaxation between **1** and  $[\text{Cp}^{i\text{Pr}5}\text{Dy}^{\text{III}}\text{Cp}^*][\text{B}(\text{C}_6\text{F}_5)_4]$  or  $[\text{Dy}(\text{Cp}^{i\text{Pr}4})_2][\text{B}(\text{C}_6\text{F}_5)_4]$ .

### 3. Figures and Tables

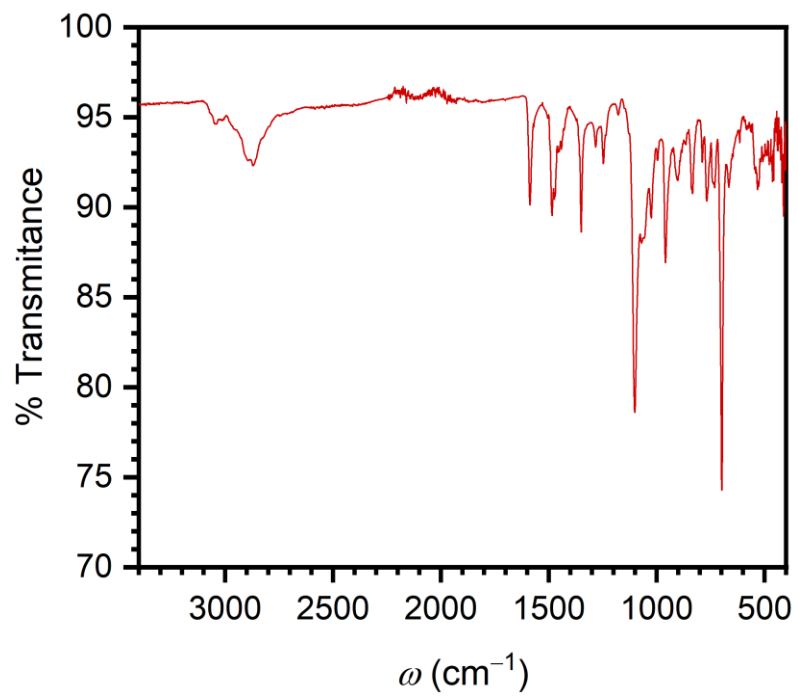

**Figure S1.** Fourier-transform infrared spectrum of **1**.



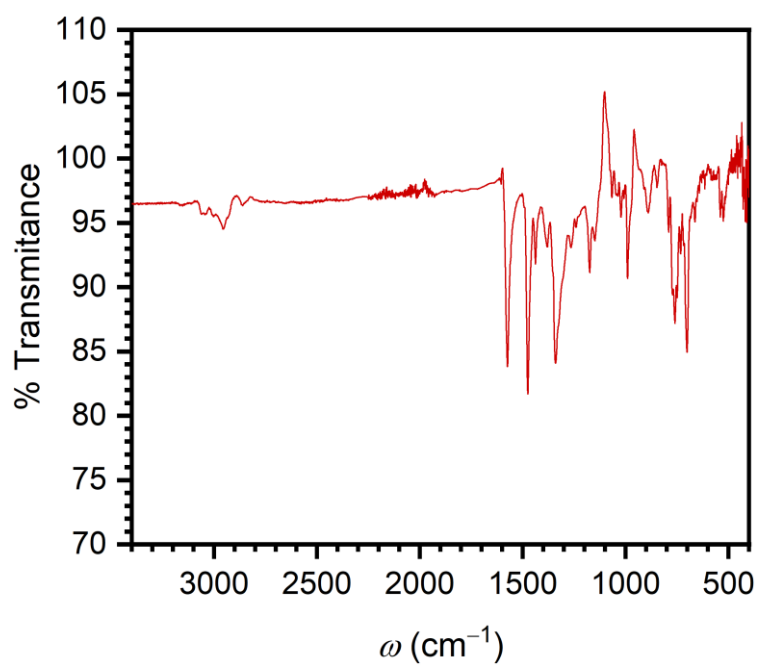

**Figure S2.** Fourier transform infrared spectrum of putative 1·2THF

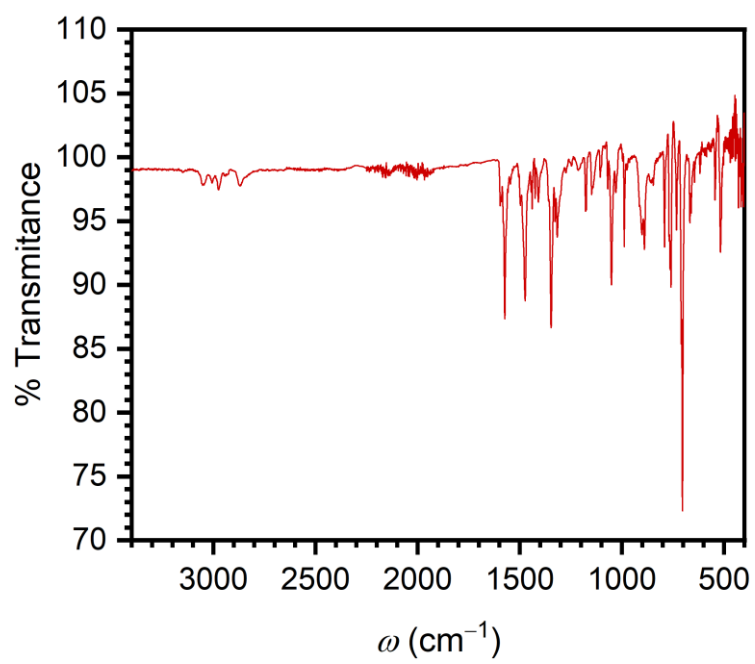

**Figure S3.** Fourier-transform infrared spectrum of K<sub>2</sub>BC<sub>4</sub>Ph<sub>5</sub>.

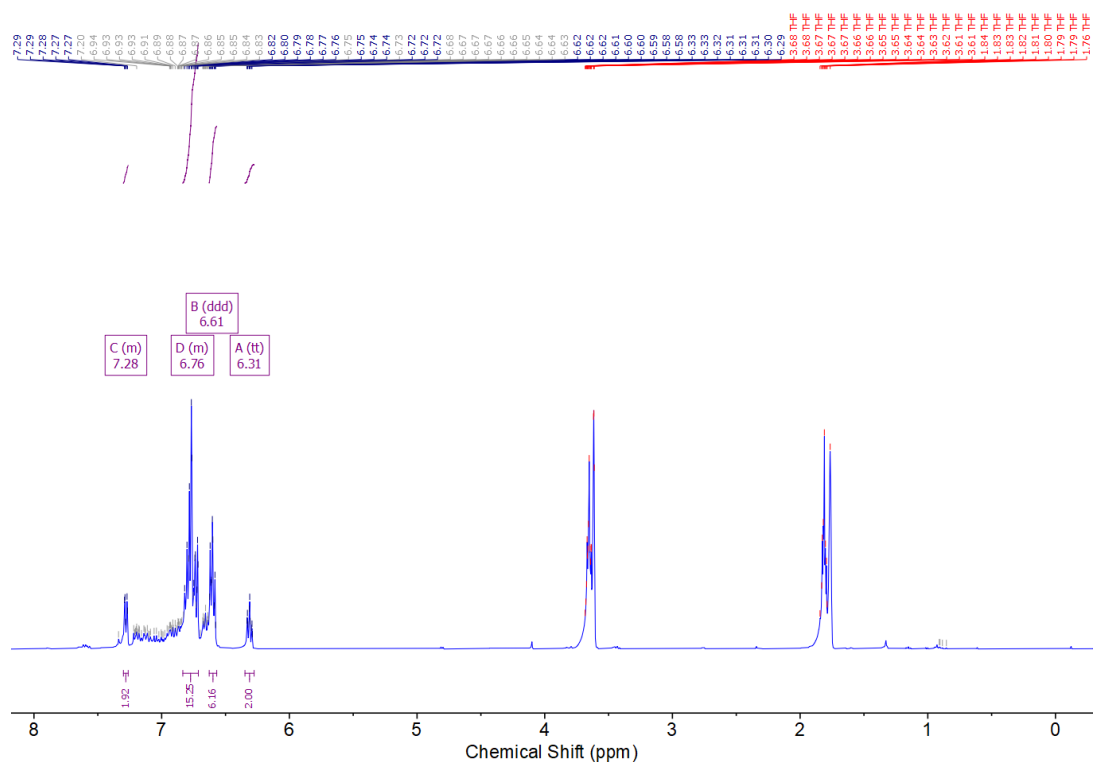

**Figure S4.**  $^1\text{H}$  NMR Spectrum of  $\text{K}_2\text{BC}_4\text{Ph}_5$ .  $^1\text{H}$  NMR (400 MHz, THF)  $\delta$  7.30 – 7.26 (m, 2H), 6.83 – 6.71 (m, 15H), 6.61 (ddd,  $J = 10.2, 5.4, 2.0$  Hz, 6H), 6.31 (tt,  $J = 7.1, 1.4$  Hz, 2H).

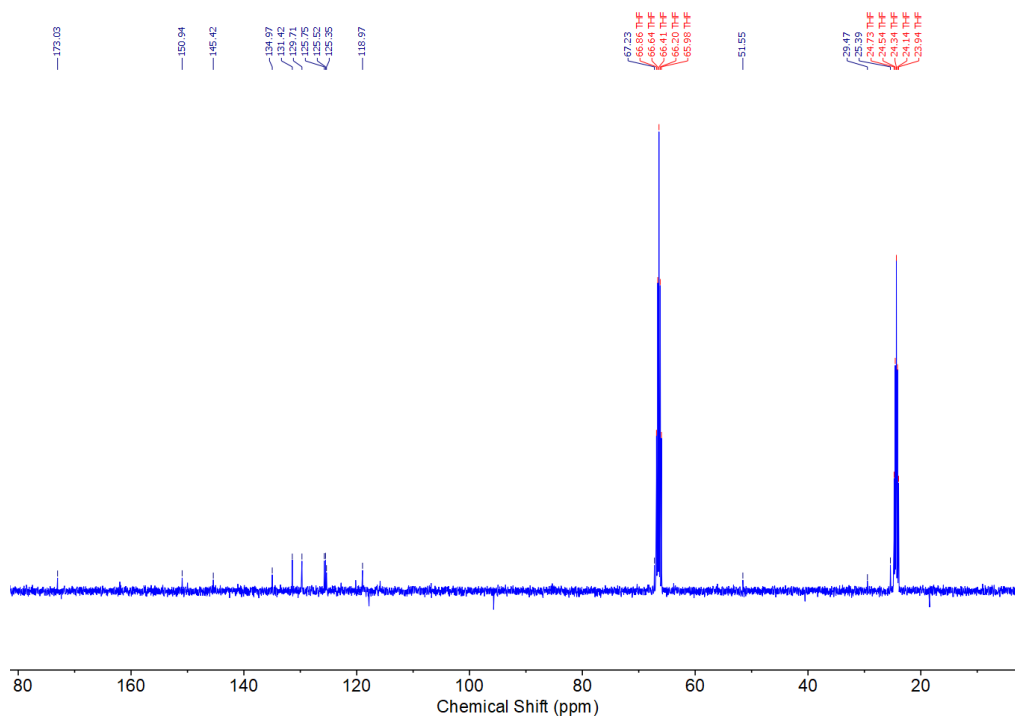

**Figure S5.**  $^{13}\text{C}$  NMR spectrum of  $\text{K}_2\text{BC}_4\text{Ph}_5$ .  $^{13}\text{C}$  NMR (101 MHz, THF)  $\delta$  173.03, 150.94, 145.42, 134.97, 131.42, 129.71, 125.75, 125.52, 125.35, 118.97, 67.23, 51.55, 29.47, 25.39.

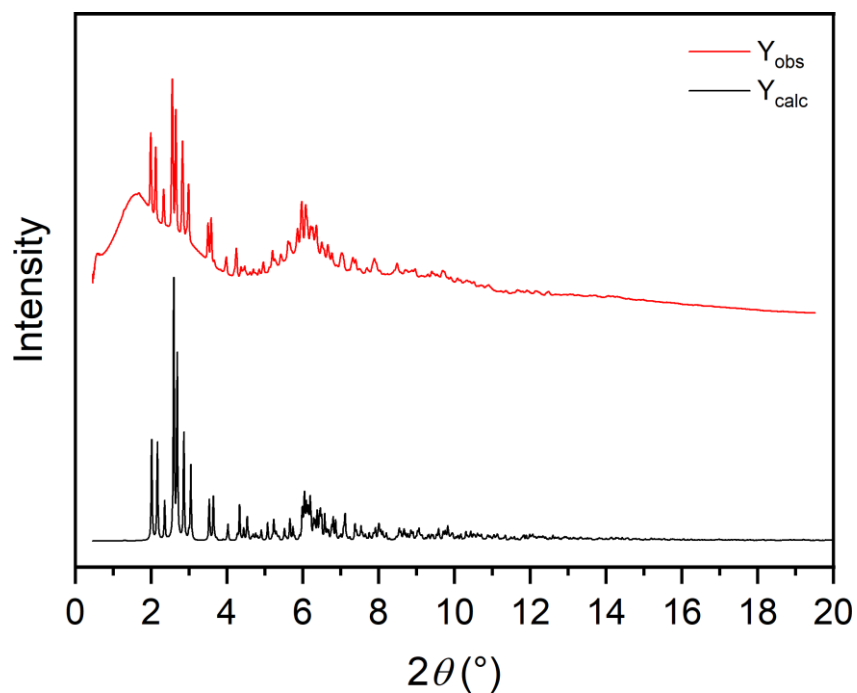

**Figure S6.** Comparison of powder x-ray diffraction pattern obtained for mechanically crushed crystals of **1** (red trace) with the simulated diffraction pattern based on the single-crystal structure of **1**·2THF (black trace). The sharp peaks in both patterns overlap, suggesting that the bulk structure of desolvated **1** and **1**·2THF are the same. The broadness, particularly at low angles, in the experimental pattern for **1** is likely background scattering from the borosilicate sample capillary.

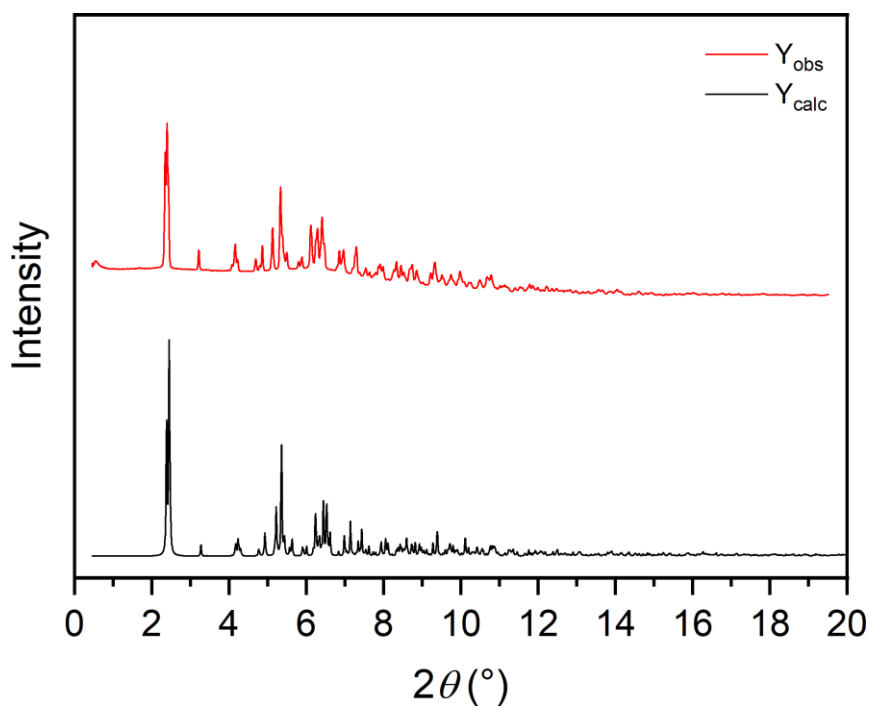

**Figure S7.** Comparison of powder x-ray diffraction pattern obtained for  $K_2BC_4Ph_5$  (red trace) with a simulated pattern derived from CCDC:701219 (black trace).<sup>24</sup>

**Table S1.** Unit Cell Parameters and Refinement Metrics for **1·2THF**.

---

|                                                              |                                                                                   |
|--------------------------------------------------------------|-----------------------------------------------------------------------------------|
| Empirical formula                                            | C <sub>88</sub> H <sub>90</sub> B <sub>2</sub> Dy <sub>0.97</sub> KO <sub>8</sub> |
| Formula weight                                               | 1494.75                                                                           |
| Temperature/K                                                | 100                                                                               |
| Crystal system                                               | triclinic                                                                         |
| Space group                                                  | P-1                                                                               |
| <i>a</i> /Å                                                  | 12.547(5)                                                                         |
| <i>b</i> /Å                                                  | 15.210(6)                                                                         |
| <i>c</i> /Å                                                  | 20.620(8)                                                                         |
| <i>α</i> /°                                                  | 96.799(4)                                                                         |
| <i>β</i> /°                                                  | 100.948(4)                                                                        |
| <i>γ</i> /°                                                  | 101.827(4)                                                                        |
| Volume/Å <sup>3</sup>                                        | 3731(3)                                                                           |
| <i>Z</i>                                                     | 2                                                                                 |
| $\rho_{\text{calc}}/\text{cm}^3$                             | 1.331                                                                             |
| $\mu/\text{mm}^{-1}$                                         | 1.155                                                                             |
| F(000)                                                       | 1551.0                                                                            |
| Crystal size/mm <sup>3</sup>                                 | 0.05 × 0.05 × 0.04                                                                |
| Radiation                                                    | synchrotron ( $\lambda = 0.7288$ )                                                |
| 2 $\Theta$ range for data collection/°                       | 2.844 to 54.194                                                                   |
| Index ranges                                                 | -15 ≤ <i>h</i> ≤ 15, -19 ≤ <i>k</i> ≤ 18, -25 ≤ <i>l</i> ≤ 25                     |
| Reflections collected                                        | 64045                                                                             |
| Independent reflections                                      | 15231 [ <i>R</i> <sub>int</sub> = 0.0656, <i>R</i> <sub>sigma</sub> = 0.0580]     |
| Data/restraints/parameters                                   | 15231/235/1069                                                                    |
| Goodness-of-fit on F <sup>2</sup>                            | 1.031                                                                             |
| Final <i>R</i> indexes [ <i>I</i> ≥ 2 $\sigma$ ( <i>I</i> )] | <i>R</i> <sub>1</sub> = 0.0572, <i>wR</i> <sub>2</sub> = 0.1582                   |
| Final <i>R</i> indexes [all data]                            | <i>R</i> <sub>1</sub> = 0.0721, <i>wR</i> <sub>2</sub> = 0.1701                   |

---

**Table S2.** Selected Distances and Angles for **1**-2THF.

| <b>Anion Index</b> | <b>Dy Site</b> | <b>Occupancy</b> | <b>Dy–centroid (Å)</b>   | <b>centroid–Dy–centroid angle (°)</b> |
|--------------------|----------------|------------------|--------------------------|---------------------------------------|
| 1                  | Dy1A           | 0.35523          | 2.3491(13)<br>2.2641(10) | 155.99(13)                            |
|                    | Dy1B           | 0.12429          | 2.334(3)<br>2.275(2)     | 156.5(4)                              |
| 2                  | Dy2A           | 0.46247          | 2.2118(8)<br>2.4187(8)   | 156.18(2)                             |
|                    | Dy2B           | 0.03418          | 2.392(6)<br>2.266(6)     | 153.2(3)                              |
| Average            |                |                  | 2.33 ± 0.09              | 156 ± 1                               |

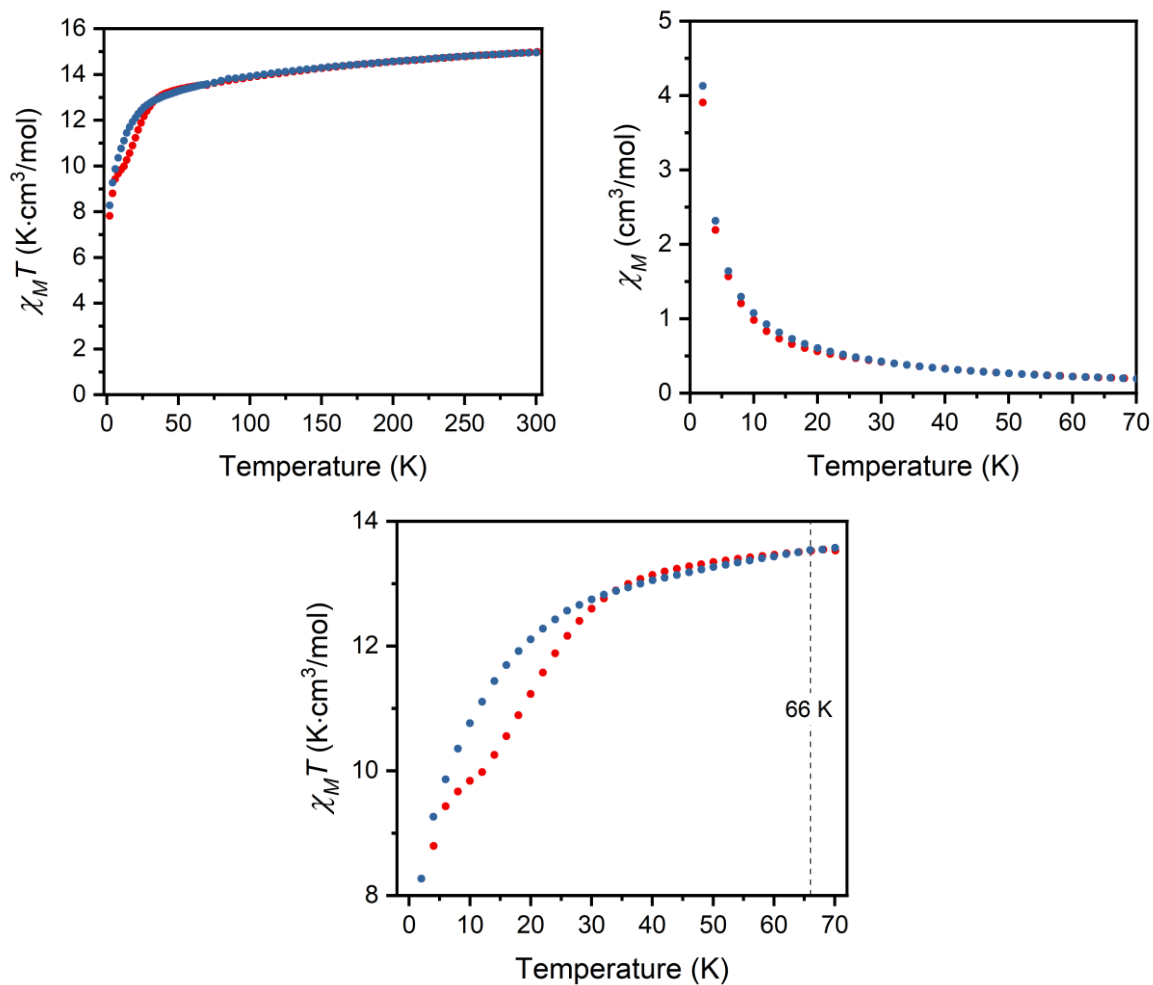

**Figure S8.** (Upper left) Temperature dependence of the molar magnetic susceptibility times temperature ( $\chi_M T$ ) for a sample of one **1** cooled under zero dc field (red symbols) and under a field of 0.1 T (blue symbols). All data were collected under  $H_{dc} = 0.1$  T. (Upper right) Temperature dependence of the molar magnetic susceptibility ( $\chi_M$ ) for a sample of one **1** cooled under zero dc field (red symbols) and under a field of 0.1 T (blue symbols). All data were collected under  $H_{dc} = 0.1$  T. (Lower) Expanded view of the data in the upper plot from 2 to 70 K, showing  $T_{irrev}$  at 66 K.

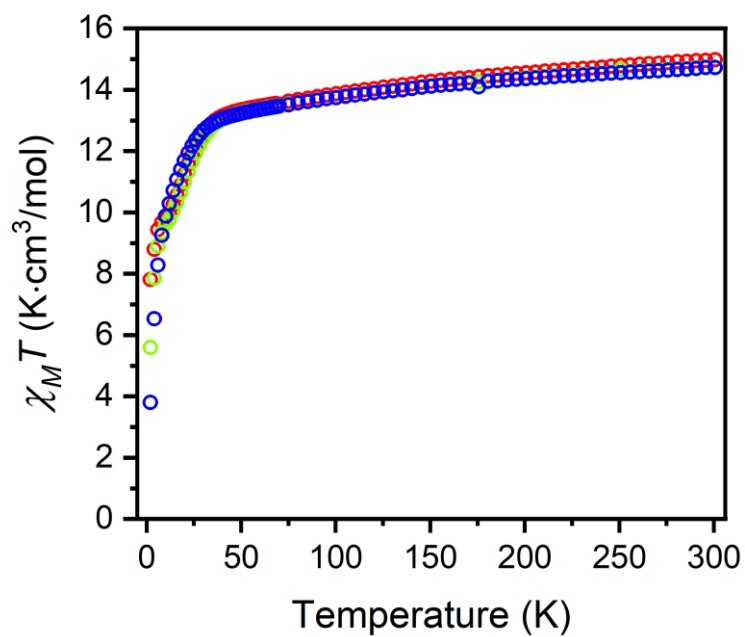

**Figure S9.** Temperature dependence of the molar magnetic susceptibility times temperature ( $\chi_M T$ ) for a sample of one **1** cooled under zero dc field. Blue, green, and red symbols correspond to data collected under dc fields of 1, 0.5, and 0.1 T, respectively.



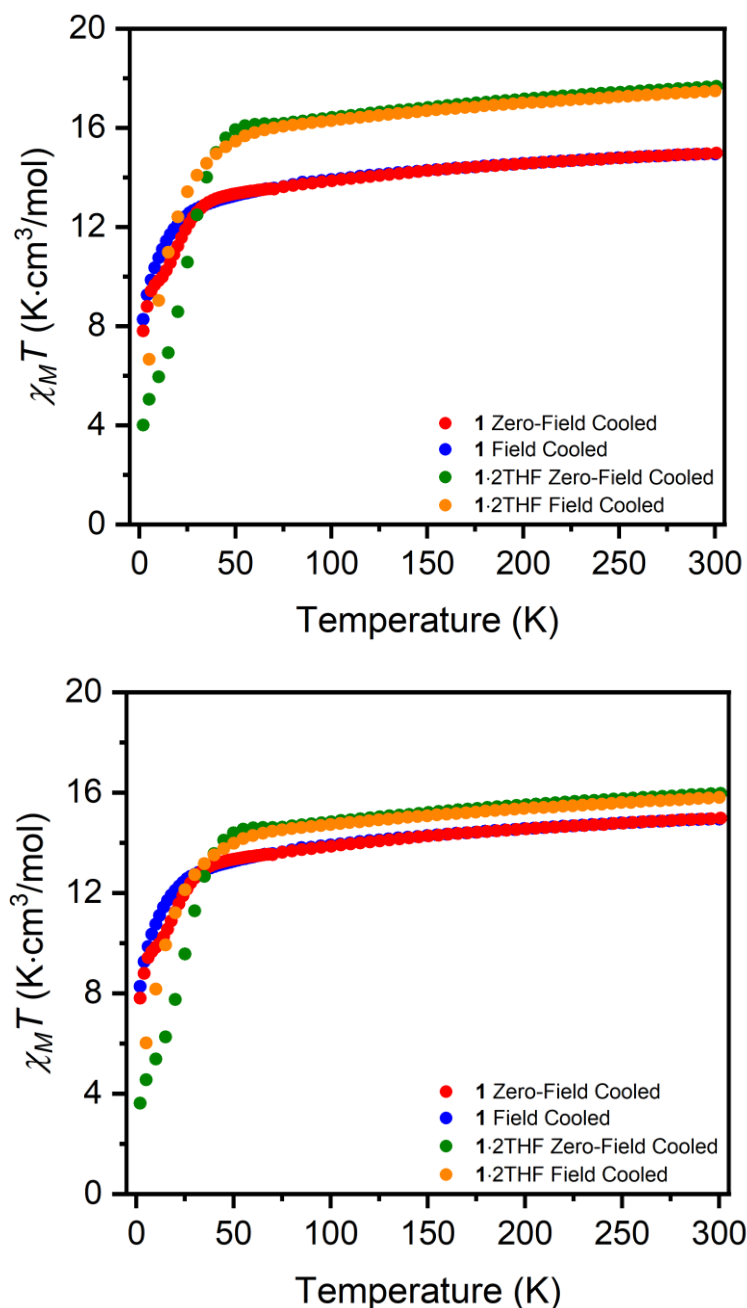

**Figure S10.** (Upper) Temperature dependence of the molar magnetic susceptibility times temperature ( $\chi_M T$ ) for a sample of purported **1·2THF** cooled under zero dc field (green symbols) and under a field of 0.1 T (orange symbols). Data were worked up using the measured sample mass of 12.6 mg and using the molecular mass of 1498.9 g/mol for **1·2THF**. It is clear that the magnitude of the susceptibility is much higher than that measured for **1** at room temperature (red symbols represent zero-field cooled data and blue symbols represent field-cooled data, both measured under 0.1 T applied field) and much higher than predicted for free Dy<sup>3+</sup>, 14.17 emu·K/mol, suggesting the molar mass used does not reflect the actual composition of the sample. (Lower) Adjusted temperature dependence of the molar magnetic susceptibility times temperature ( $\chi_M T$ ) for the sample of purported **1·2THF**, where the sample molar mass was set to that of desolvated **1**, 1354.7 g/mol, which brings the magnitude of  $\chi_M T$  at 300 K in into near agreement with that obtained for the fully desolvated sample **1**. This suggests that the sample of **1·2THF** used to prepare the second magnetic sample desolvates at least partially.

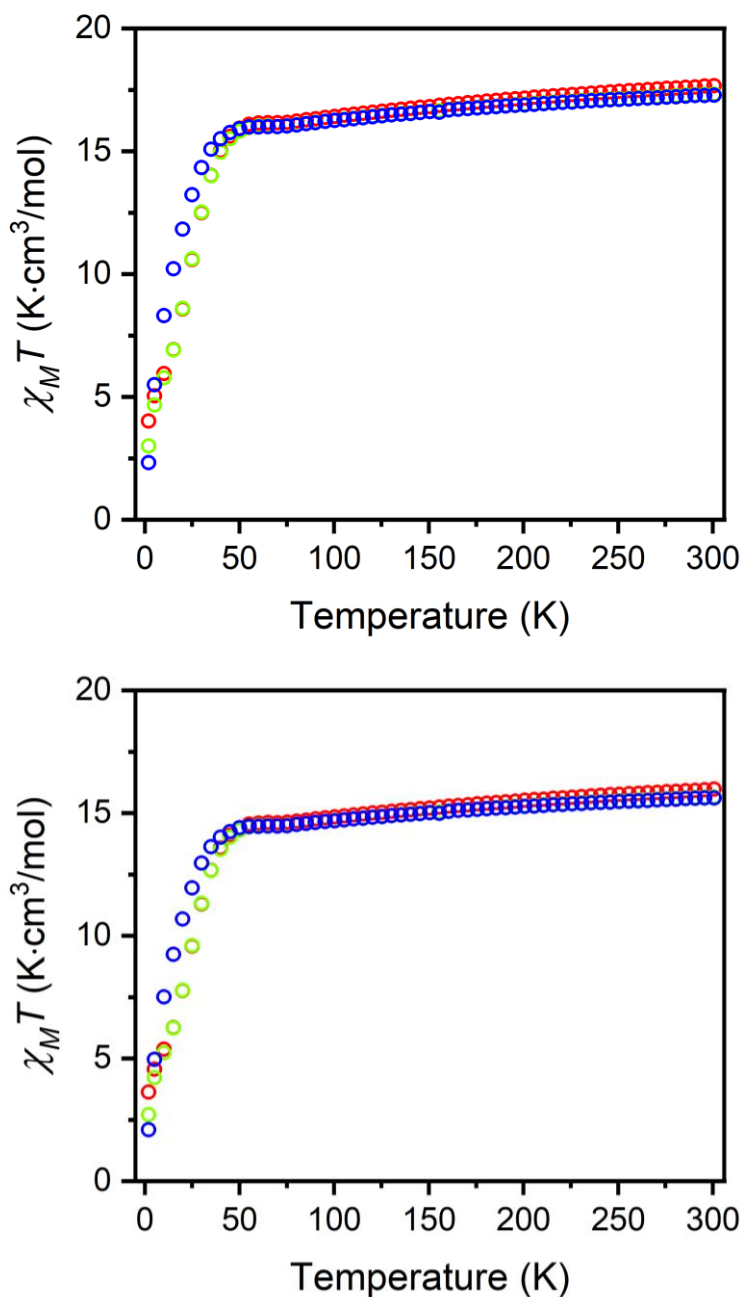

**Figure S11.** (Upper) Temperature dependence of the molar magnetic susceptibility times temperature ( $\chi_M T$ ) for a sample of putative **1**·2THF cooled under zero dc field. Blue, green, and red symbols correspond to data collected under dc fields of 1, 0.5, and 0.1 T, respectively. Data were worked up using the measured sample mass of 12.6 mg and using the molecular mass of 1498.9 g/mol for **1**·2THF. It is clear that the magnitude of the susceptibility is much higher than that measured for **1** at room temperature (see Figure S9) and also much higher than predicted for free  $\text{Dy}^{3+}$  (14.17 emu·K/mol), indicating the molar mass used does not reflect the composition of the sample. (Lower) Adjustment of the data shown in the upper panel using a molar mass of 1354.7 g/mol, corresponding to desolvated **1**, brings the  $\chi_M T$  magnitudes into near agreement with those collected for **1**, suggesting that the **1**·2THF used to prepare the second magnetic sample is at least partially desolvated.

**Table S3.** Tabulated Decay Fit Parameters for **1**. Estimated uncertainties in  $\tau$  at the  $1\sigma$  level were calculated with  $\tau_{\pm} = \tau \exp\left\{\pm \frac{1.64 \tan\left[\frac{\pi}{2}(1-\beta)\right]}{(1-\beta)^{0.1441}}\right\}$  derived in Ref. 22 where  $\tau$  and  $\beta$  are the fitted values from the stretched exponential function, and  $\tau_{\pm}$  are the limits of the  $1\sigma$  uncertainties.

| $T$ (K) | $\tau$ (s) | $\beta$ | $\tau_+$ | $\tau_-$ |
|---------|------------|---------|----------|----------|
| 2       | 1277       | 0.774   | 1425     | 673      |
| 3       | 1086       | 0.710   | 1739     | 669      |
| 4       | 1093       | 0.711   | 1741     | 671      |
| 5       | 1094       | 0.712   | 1733     | 671      |
| 6       | 1079       | 0.716   | 1673     | 656      |
| 7       | 1046       | 0.713   | 1648     | 640      |
| 8       | 1024       | 0.726   | 1503     | 609      |
| 9       | 966        | 0.730   | 1387     | 569      |
| 10      | 926        | 0.741   | 1250     | 532      |
| 12      | 826        | 0.754   | 1036     | 460      |
| 14      | 729        | 0.760   | 883      | 399      |
| 16      | 647        | 0.757   | 797      | 357      |
| 18      | 583        | 0.754   | 731      | 324      |
| 20      | 526        | 0.747   | 686      | 298      |
| 22      | 480        | 0.739   | 655      | 277      |
| 24      | 443        | 0.733   | 625      | 259      |
| 28      | 383        | 0.731   | 547      | 225      |
| 32      | 338        | 0.733   | 477      | 198      |
| 36      | 297        | 0.738   | 408      | 172      |
| 40      | 244        | 0.760   | 296      | 134      |
| 44      | 244        | 0.760   | 296      | 134      |
| 48      | 227        | 0.778   | 247      | 118      |
| 52      | 201        | 0.776   | 222      | 105      |
| 56      | 185        | 0.813   | 162      | 86       |
| 60      | 157        | 0.791   | 158      | 79       |
| 64      | 131        | 0.862   | 80       | 50       |

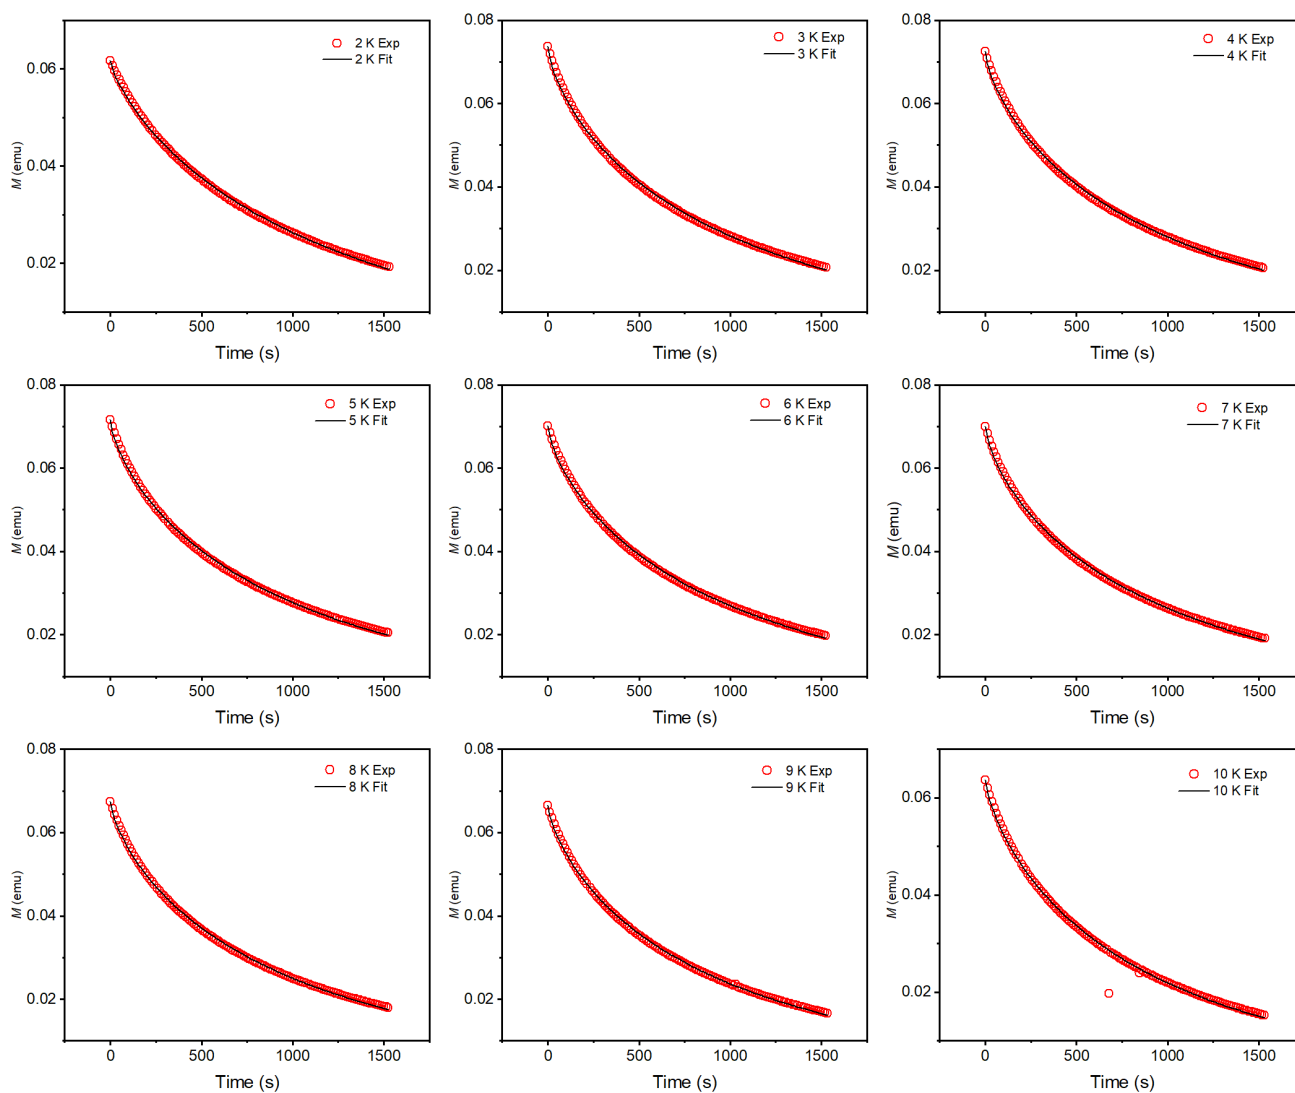

**Figure S12.** Normalized magnetization decay plots for **1** collected at the indicated temperatures. Circles indicate data points and black lines are fits using eq S1. The sample was initially magnetized under an applied magnetic field of 7 T for 5 min prior to data collection.

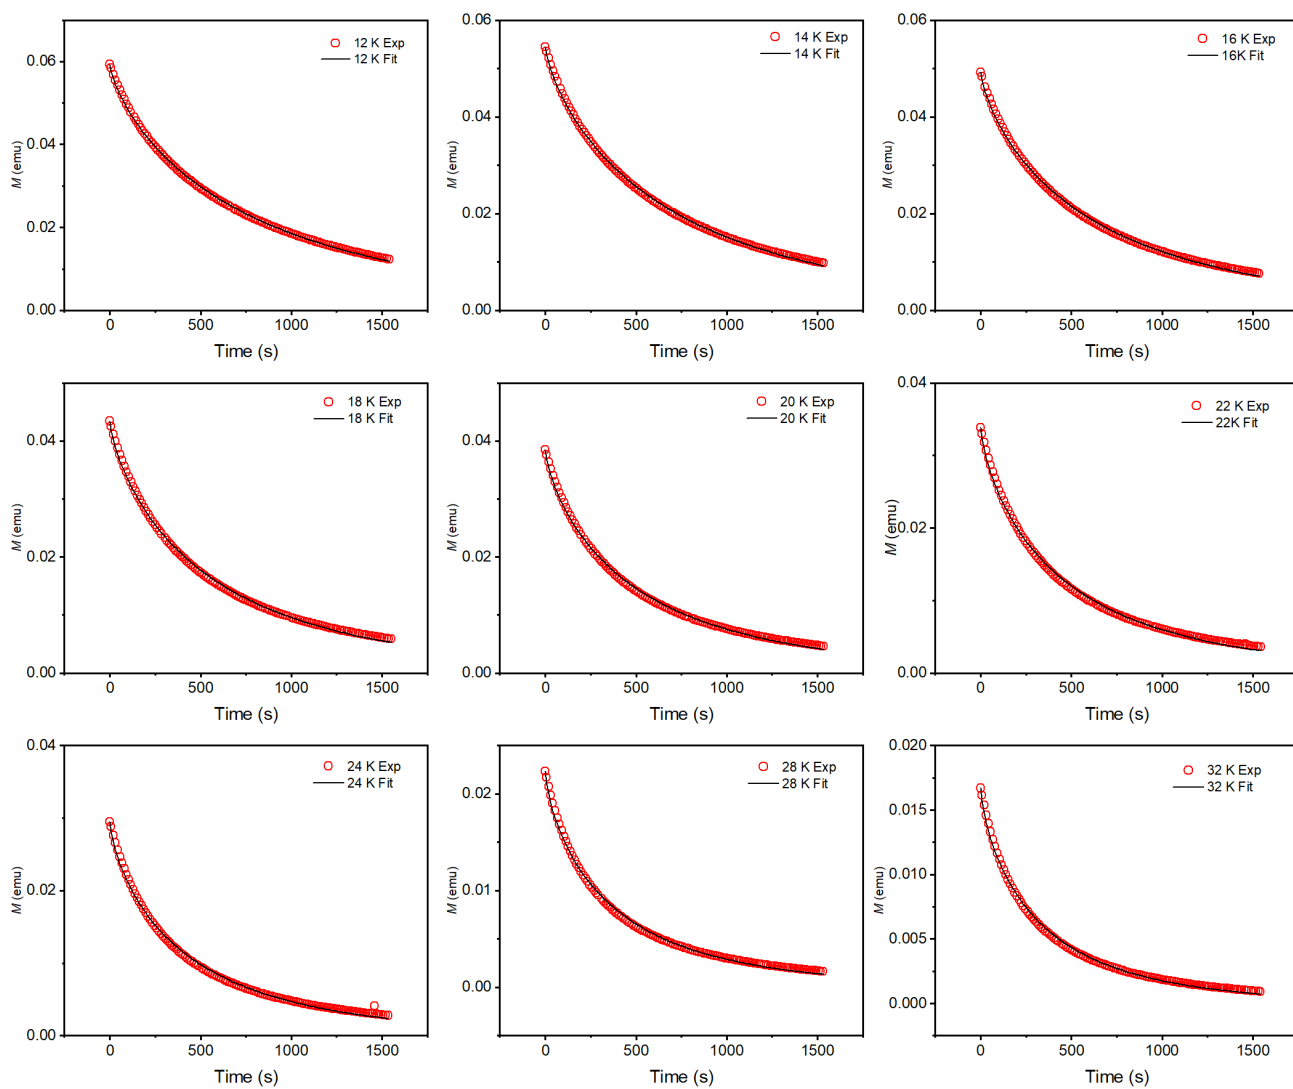

**Figure S13.** Normalized magnetization decay plots for **1** collected at the indicated temperatures. Circles indicate data points and black lines are fits using eq S1. The sample was initially magnetized under an applied magnetic field of 7 T for 5 min prior to data collection.

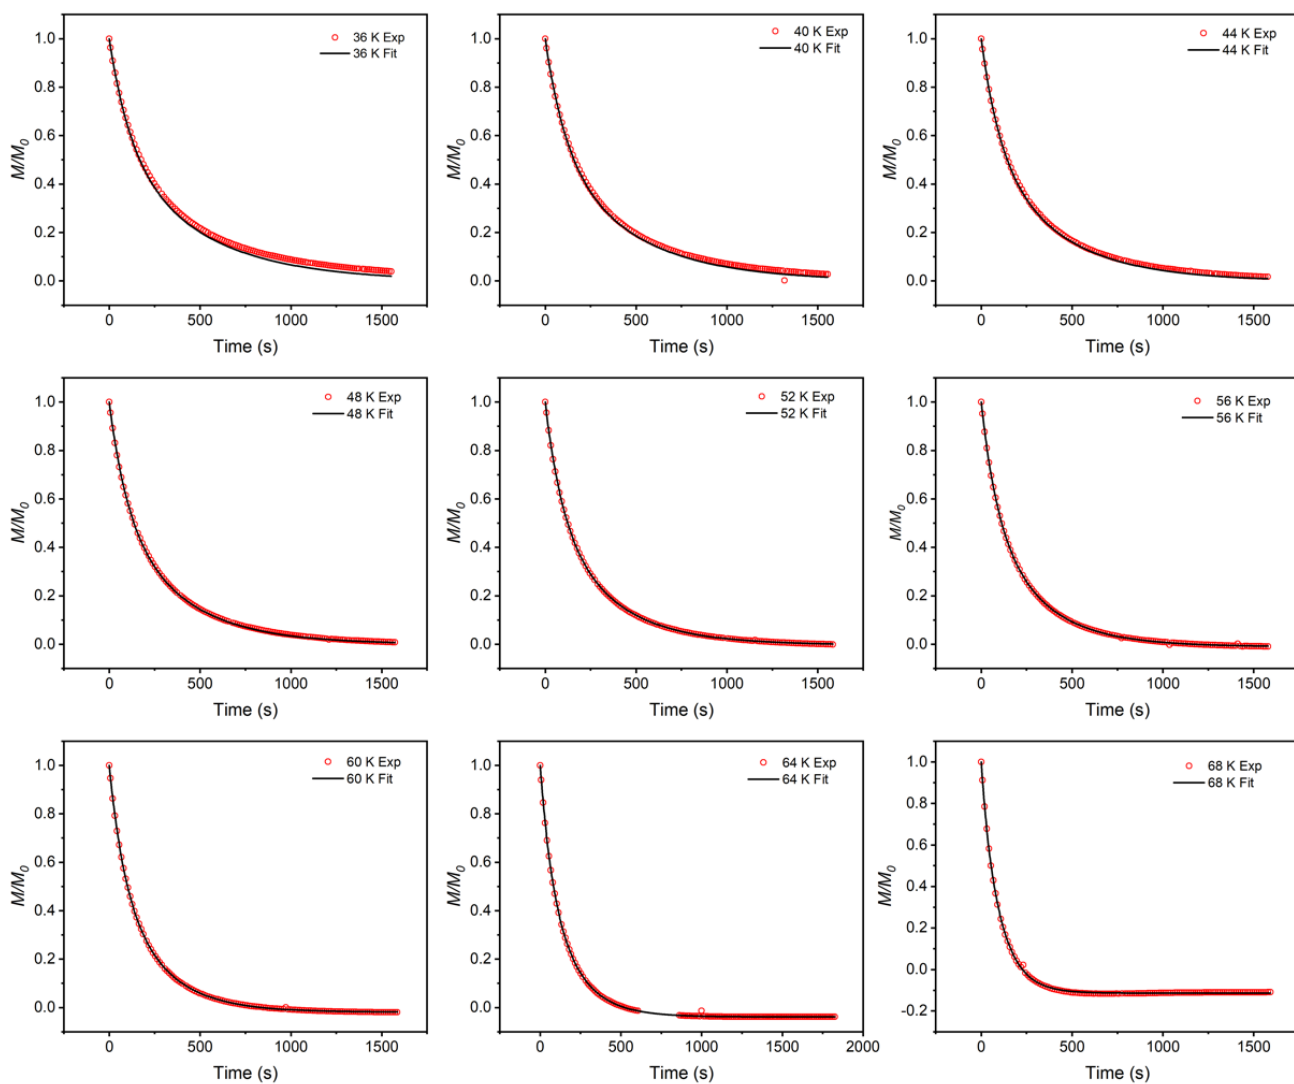

**Figure S14:** Normalized magnetization decay plots for **1** collected at the indicated temperatures. Circles indicate data points and black lines are fits using eq S1. The sample was initially magnetized under an applied magnetic field of 7 T for 5 min prior to data collection.

**Table S4.** Tabulated Decay Fit Parameters obtained for a magnetic sample prepared from crystals of **1**·2THF (see Section 1.6). Data are intended to verify reproducibility of data collected for **1** only. Estimated uncertainties in  $\tau$  at the  $1\sigma$  level were calculated with  $\tau_{\pm} = \tau \exp\{\pm \frac{1.64 \tan[\frac{\pi}{2}(1-\beta)]}{(1-\beta)^{0.141}}\}$  derived in Ref. 22 where  $\tau$  and  $\beta$  are the fitted values from the stretched exponential function, and  $\tau_{\pm}$  are the limits of the  $1\sigma$  uncertainties.

| <b><i>T</i> (K)</b> | <b><math>\tau</math> (s)</b> | <b><math>\beta</math></b> | <b><math>\tau_+</math></b> | <b><math>\tau_-</math></b> |
|---------------------|------------------------------|---------------------------|----------------------------|----------------------------|
| 2                   | 1048                         | 0.688                     | 1884                       | 674                        |
| 4                   | 988                          | 0.694                     | 1722                       | 628                        |
| 6                   | 951                          | 0.690                     | 1691                       | 609                        |
| 8                   | 944                          | 0.698                     | 1618                       | 597                        |
| 10                  | 883                          | 0.708                     | 1430                       | 546                        |
| 12                  | 823                          | 0.752                     | 1046                       | 461                        |
| 14                  | 742                          | 0.721                     | 1119                       | 446                        |
| 16                  | 693                          | 0.727                     | 1012                       | 412                        |
| 18                  | 635                          | 0.729                     | 916                        | 375                        |
| 20                  | 575                          | 0.725                     | 848                        | 343                        |
| 22                  | 540                          | 0.728                     | 788                        | 320                        |
| 24                  | 503                          | 0.728                     | 728                        | 297                        |
| 28                  | 444                          | 0.733                     | 625                        | 260                        |
| 32                  | 393                          | 0.738                     | 539                        | 227                        |
| 36                  | 345                          | 0.740                     | 468                        | 198                        |
| 40                  | 315                          | 0.750                     | 403                        | 177                        |
| 44                  | 286                          | 0.760                     | 346                        | 157                        |
| 48                  | 260                          | 0.770                     | 297                        | 139                        |
| 52                  | 234                          | 0.777                     | 256                        | 122                        |
| 56                  | 228                          | 0.879                     | 120                        | 79                         |
| 60                  | 148                          | 0.797                     | 144                        | 73                         |
| 64                  | 147                          | 0.877                     | 79                         | 51                         |
| 68                  | 105                          | 0.875                     | 57                         | 37                         |

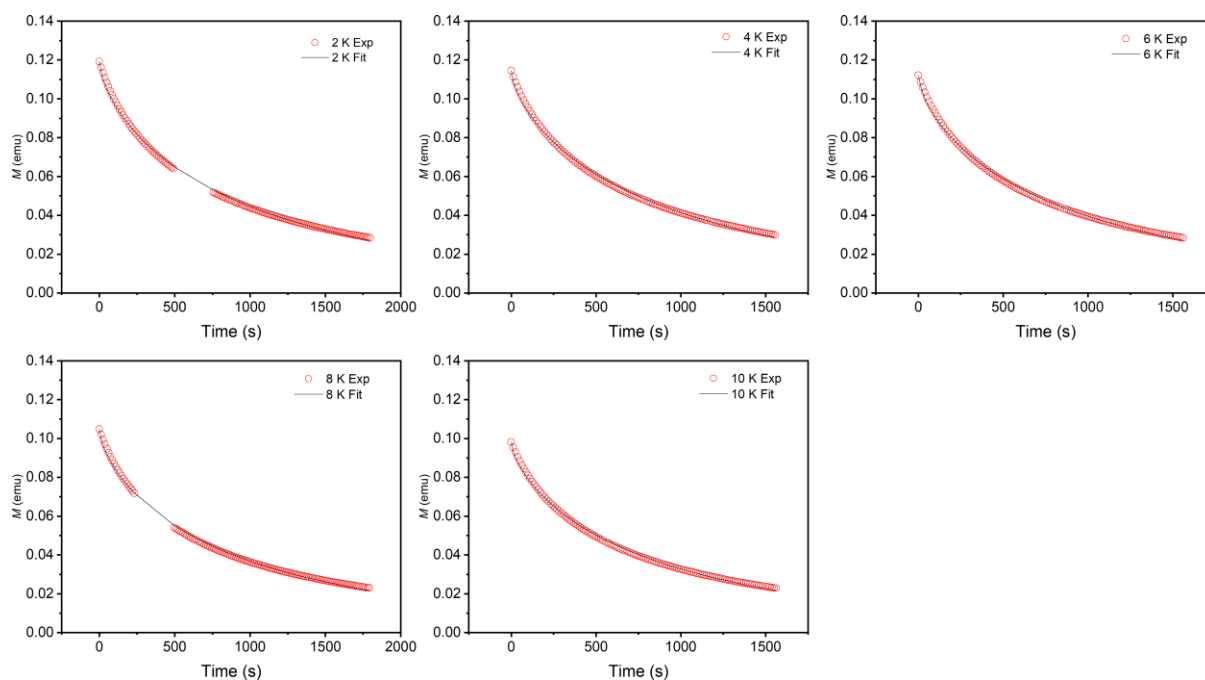

**Figure S15.** Normalized magnetization decay plots obtained for a magnetic sample prepared from crystals of **1**·2THF (see Section 1.6). Data are shown only to verify reproducibility of data collected for **1**, given the uncertainty in the solvation state of the compound. Circles indicate data points and black lines are fits using eq S1. The sample was initially magnetized under an applied magnetic field of 7 T for 5 min prior to data collection.



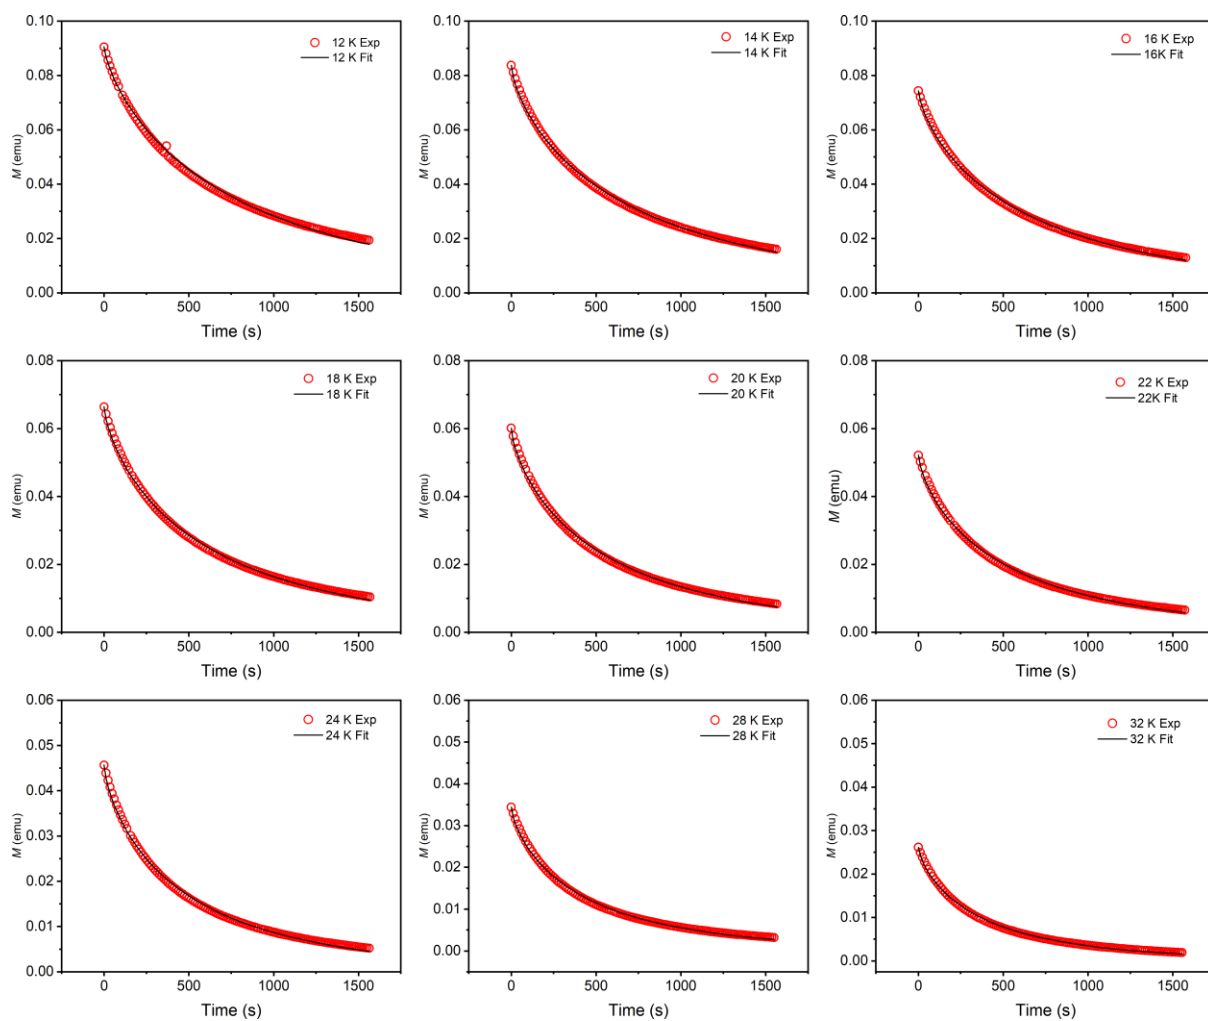

**Figure S16.** Normalized magnetization decay plots obtained for a magnetic sample prepared from **1**·2THF. Data are shown only to verify reproducibility of data collected for **1**, due to the uncertainty in the solvation state of the compound. Circles indicate data points and black lines are fits using eq S1. The sample was initially magnetized under an applied magnetic field of 7 T for 5 min prior to data collection.

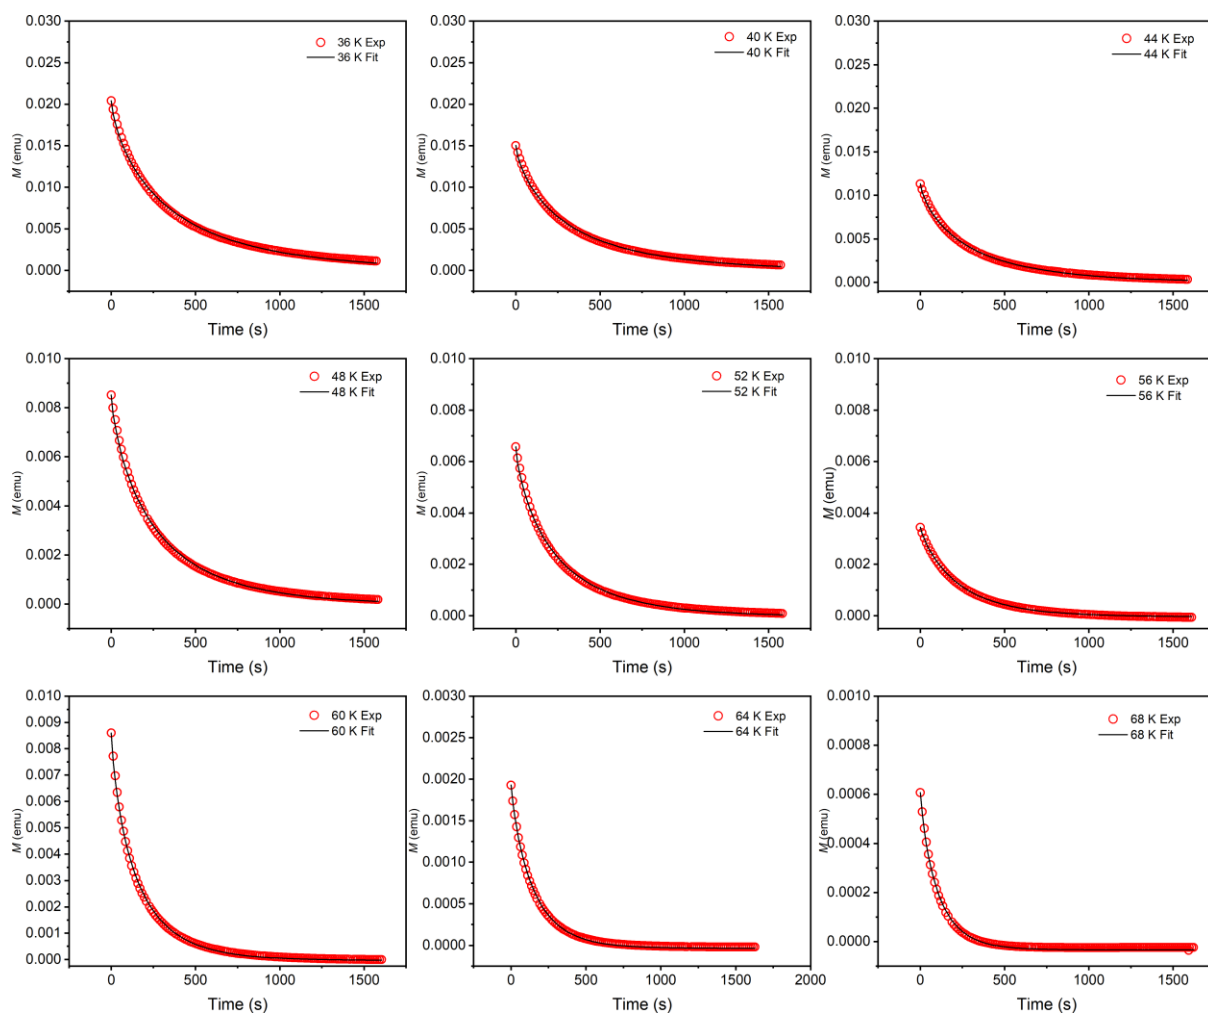

**Figure S17.** Normalized magnetization decay plots obtained for a magnetic sample prepared from 1·2THF. Data are only intended to verify reproducibility of data collected for **1**, due to the uncertainty in the solvation state of the compound. Circles indicate data points and black lines are fits using eq S1. The sample was initially magnetized under an applied magnetic field of 7 T for 5 min prior to data collection.

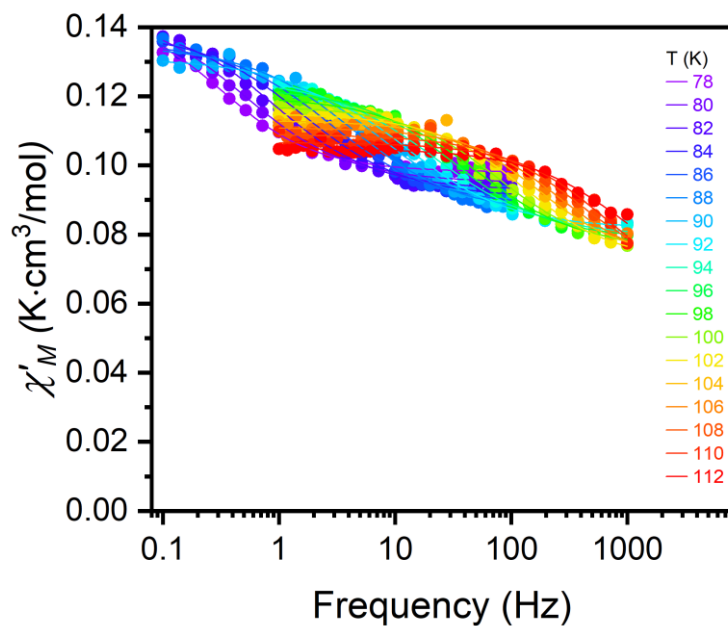

**Figure S18.** Molar in-phase ac magnetic susceptibility versus frequency data for **1**, collected under zero dc field. Symbols represent experimental data and lines are fits to the generalized Debye model (eqs S2 and S3). The susceptibility does not go to zero at the highest frequencies, suggesting that there is a second, faster relaxation process occurring outside of the measured frequency range.

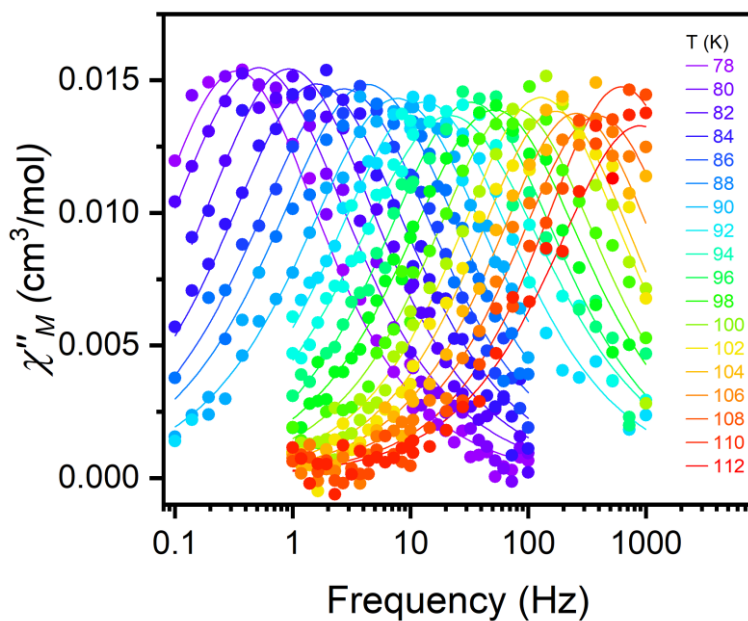

**Figure S19.** Molar out-of-phase ac magnetic susceptibility versus frequency data for **1**, collected under zero dc field. Symbols represent experimental data and lines are fits to the generalized Debye model (eqs S2 and S3).

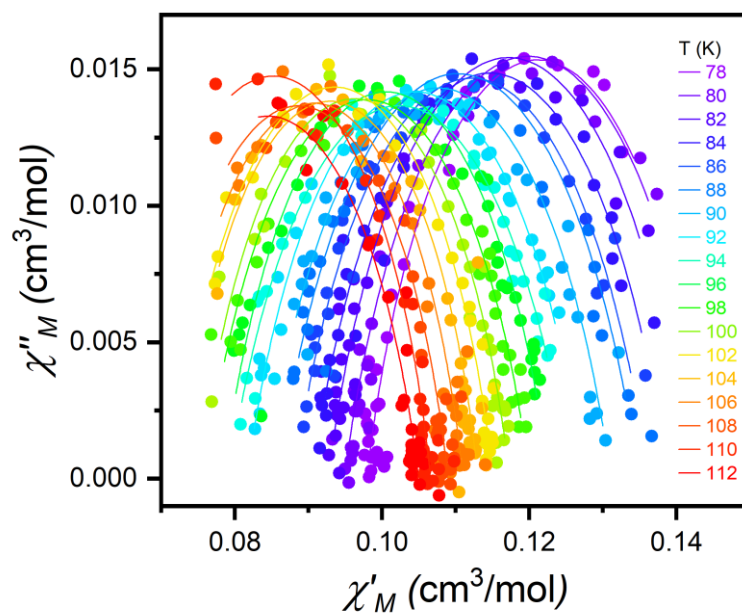

**Figure S20.** Cole-Cole plots for **1** generated from zero-field ac susceptibility data. Symbols represent experimental data and lines are fits to the generalized Debye model (eqs S2 and S3).

**Table S5.** Ac susceptibility fit parameters for **1**. All  $\chi_s$  and  $\chi$  values are reported in emu/mol.

| $T$ (K) | $\tau$ (s) | $\tau$ Error (s) | $\chi_s$ | $\chi_s$ Error | $\chi_T$ | $\chi_T$ Error | $\alpha$ | $\alpha$ error |
|---------|------------|------------------|----------|----------------|----------|----------------|----------|----------------|
| 78      | 0.48       | 0.03             | 0.0979   | 0.0002         | 0.144    | 0.001          | 0.26     | 0.02           |
| 80      | 0.31       | 0.02             | 0.0948   | 0.0003         | 0.145    | 0.001          | 0.29     | 0.02           |
| 82      | 0.171      | 0.008            | 0.0926   | 0.0003         | 0.1417   | 0.0009         | 0.29     | 0.02           |
| 84      | 0.099      | 0.004            | 0.0905   | 0.0004         | 0.1388   | 0.0007         | 0.30     | 0.02           |
| 86      | 0.058      | 0.002            | 0.0880   | 0.0004         | 0.1362   | 0.0007         | 0.30     | 0.02           |
| 88      | 0.037      | 0.002            | 0.0857   | 0.0007         | 0.1349   | 0.0007         | 0.31     | 0.02           |
| 90      | 0.0207     | 0.0008           | 0.0841   | 0.0006         | 0.1311   | 0.0005         | 0.30     | 0.02           |
| 92      | 0.0121     | 0.0003           | 0.0816   | 0.0003         | 0.1274   | 0.0005         | 0.29     | 0.01           |
| 94      | 0.0074     | 0.0003           | 0.0791   | 0.0005         | 0.1255   | 0.0005         | 0.32     | 0.02           |
| 96      | 0.0049     | 0.0002           | 0.0784   | 0.0005         | 0.1227   | 0.0004         | 0.27     | 0.01           |
| 98      | 0.0031     | 0.0001           | 0.0759   | 0.0005         | 0.1201   | 0.0003         | 0.28     | 0.01           |
| 100     | 0.0021     | 0.0001           | 0.0751   | 0.0007         | 0.1173   | 0.0003         | 0.26     | 0.02           |
| 102     | 0.0012     | 0.0000           | 0.0720   | 0.0006         | 0.1151   | 0.0002         | 0.25     | 0.01           |
| 104     | 0.00093    | 0.00005          | 0.073    | 0.001          | 0.1131   | 0.0003         | 0.24     | 0.02           |
| 106     | 0.00062    | 0.00005          | 0.071    | 0.001          | 0.1110   | 0.0003         | 0.24     | 0.03           |
| 108     | 0.00041    | 0.00003          | 0.068    | 0.002          | 0.1090   | 0.0003         | 0.25     | 0.02           |
| 110     | 0.00026    | 0.00003          | 0.064    | 0.003          | 0.1066   | 0.0003         | 0.23     | 0.03           |
| 112     | 0.00018    | 0.00003          | 0.064    | 0.003          | 0.1050   | 0.0002         | 0.27     | 0.03           |

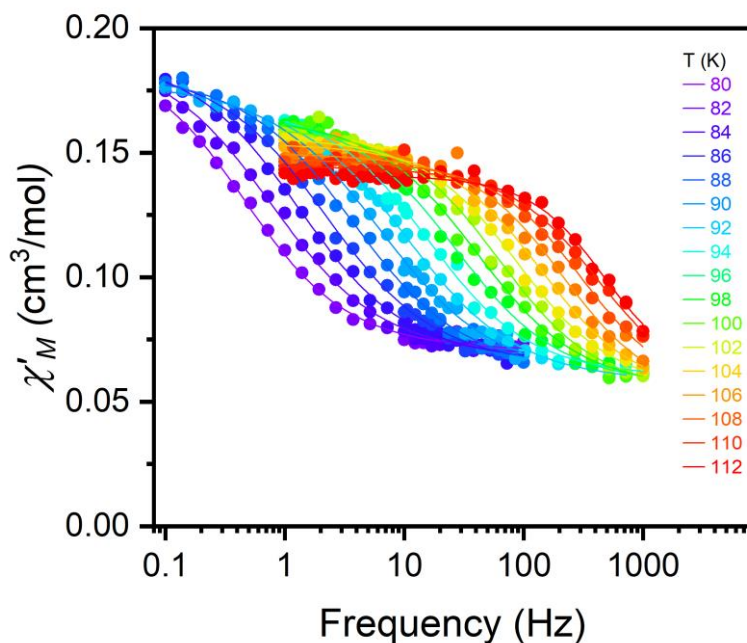

**Figure S21.** Molar in-phase ac magnetic susceptibility versus frequency data obtained under zero applied field for a magnetic sample prepared from **1**·2THF. Based on dc magnetic susceptibility measured for this sample (Figures S10 and S11), it is likely at least partially desolvated, and so data serve only to support reproducibility of data collected for **1**. Symbols represent experimental data and lines are fits to the generalized Debye model (eqs S2 and S3). Interestingly, the in-phase ac susceptibility for this sample approaches zero more closely than the same data for **1** (see Figure S18). This is the only readily apparent difference between the data obtained for the two samples.

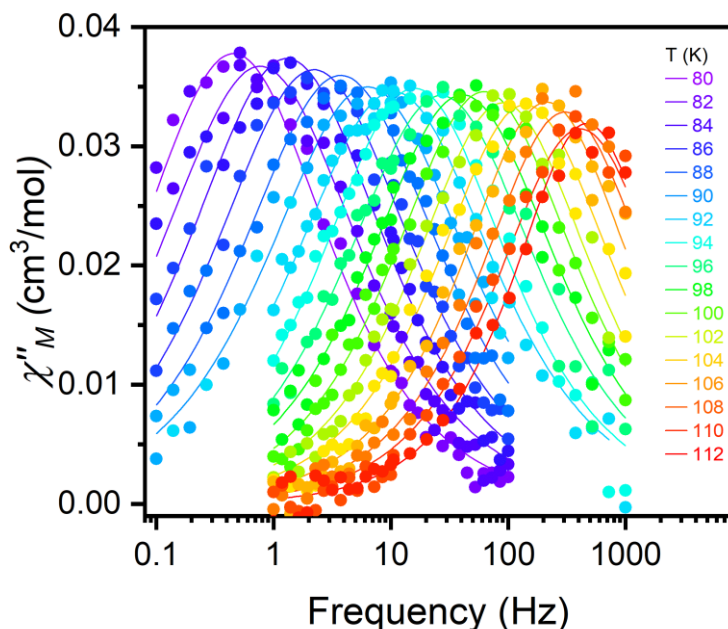

**Figure S22.** Molar out-of-phase ac magnetic susceptibility versus frequency data collected under zero applied field for a magnetic sample prepared from **1**·2THF. Based on dc magnetic susceptibility measured for this sample (Figures S10 and S11), it is likely partially desolvated, and so data serve only to support reproducibility of data collected for **1**. Symbols represent experimental data and lines are fits to the generalized Debye model (eqs S2 and S3).

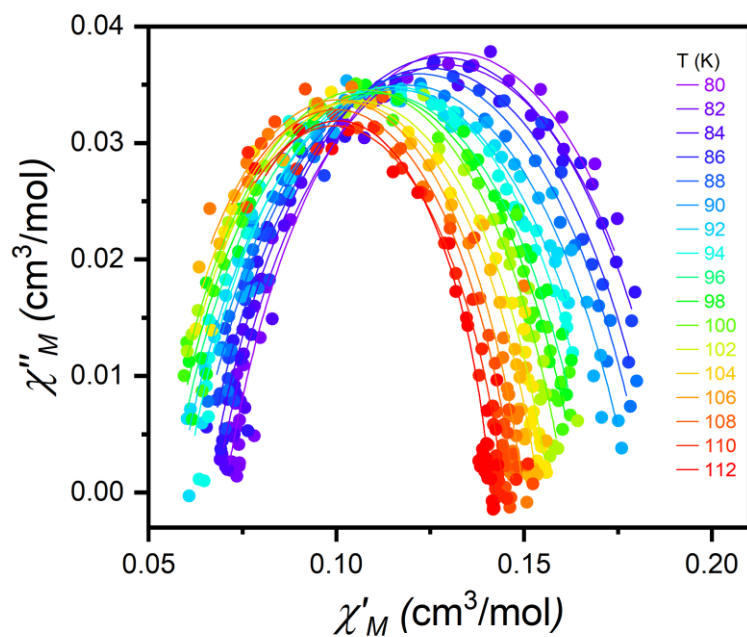

**Figure S23.** Cole-Cole plot of out-of-phase susceptibility versus in-phase susceptibility data collected under zero applied field for a magnetic sample prepared from **1**·2THF. Based on dc magnetic susceptibility measured for this sample (Figures S10 and S11), it is likely at least partially desolvated, and so data serve only to support reproducibility of data collected for **1**. Symbols represent experimental data and lines are fits to the generalized Debye model (eqs S2 and S3).

**Table S6.** Ac susceptibility fit parameters for a magnetic sample prepared from **1**-2THF, obtained from fits to data unadjusted for sample composition (see Figures S10, S11, and Section 1.6), which should affect only the magnitude of  $\chi_S$  and  $\chi_T$  (reported in emu/mol), and not the relaxation times or  $\alpha$  values. These data are intended to verify reproducibility of data collected for **1**.

| $T$ (K) | $\tau$ (s) | $\tau$ Error (s) | $\chi_S$ | $\chi_S$ Error | $\chi_T$ | $\chi_T$ Error | $\alpha$ | $\alpha$ error |
|---------|------------|------------------|----------|----------------|----------|----------------|----------|----------------|
| 80      | 0.35       | 0.01             | 0.0702   | 0.0005         | 0.192    | 0.002          | 0.29     | 0.01           |
| 82      | 0.208      | 0.009            | 0.0676   | 0.0007         | 0.191    | 0.002          | 0.32     | 0.01           |
| 84      | 0.123      | 0.004            | 0.0658   | 0.0007         | 0.190    | 0.001          | 0.31     | 0.01           |
| 86      | 0.072      | 0.002            | 0.0638   | 0.0007         | 0.186    | 0.001          | 0.31     | 0.01           |
| 88      | 0.043      | 0.001            | 0.0614   | 0.0009         | 0.183    | 0.001          | 0.32     | 0.01           |
| 90      | 0.0252     | 0.0008           | 0.060    | 0.001          | 0.178    | 0.001          | 0.32     | 0.01           |
| 92      | 0.0151     | 0.0003           | 0.0575   | 0.0007         | 0.174    | 0.001          | 0.32     | 0.01           |
| 94      | 0.0100     | 0.0003           | 0.0596   | 0.0009         | 0.170    | 0.001          | 0.28     | 0.01           |
| 96      | 0.00597    | 0.0002           | 0.056    | 0.001          | 0.1672   | 0.0009         | 0.30     | 0.01           |
| 98      | 0.00391    | 0.0001           | 0.055    | 0.001          | 0.1647   | 0.0009         | 0.29     | 0.01           |
| 100     | 0.00256    | 0.00008          | 0.053    | 0.001          | 0.1609   | 0.0007         | 0.27     | 0.01           |
| 102     | 0.00178    | 0.00005          | 0.054    | 0.001          | 0.1567   | 0.0005         | 0.26     | 0.01           |
| 104     | 0.00115    | 0.00004          | 0.052    | 0.001          | 0.1539   | 0.0004         | 0.26     | 0.01           |
| 106     | 0.00075    | 0.00004          | 0.051    | 0.002          | 0.1498   | 0.0006         | 0.24     | 0.02           |
| 108     | 0.00052    | 0.00003          | 0.052    | 0.003          | 0.1474   | 0.0006         | 0.23     | 0.02           |
| 110     | 0.00039    | 0.00003          | 0.054    | 0.003          | 0.1446   | 0.0006         | 0.22     | 0.02           |
| 112     | 0.00034    | 0.00002          | 0.060    | 0.003          | 0.1410   | 0.0004         | 0.15     | 0.02           |



**Table S7.** Arrhenius fit parameters for a magnetic sample prepared from **1**·2THF, obtained from fits to data unadjusted for sample composition (see Figures S10, S11, and Section 1.6), which should affect only the magnitude of  $\chi_S$  and  $\chi_T$  (reported in emu/mol), and not the relaxation times or  $\alpha$  values. These data are reported to verify reproducibility of data collected for **1**.

| $U_{\text{eff}}$ (cm <sup>1</sup> ) | $\tau_0$ (s)           | $C$ (s <sup>-1</sup> ·K <sup><i>n</i></sup> ) | <i>n</i> | $\tau_{\text{QTM}}$ (s) |
|-------------------------------------|------------------------|-----------------------------------------------|----------|-------------------------|
| 1600(100)                           | 10 <sup>-12.6(8)</sup> | 10 <sup>-5(2)</sup>                           | 1(1)     | 10 <sup>3.1(3)</sup>    |

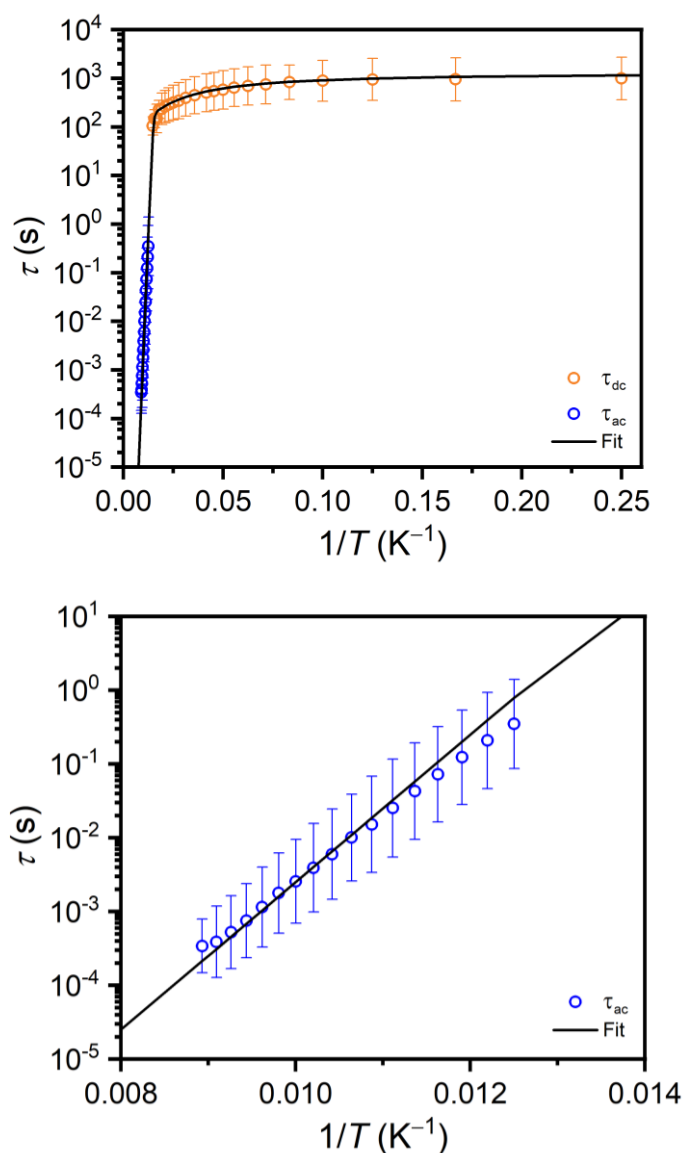

**Figure S24.** (Upper) Arrhenius plot of average relaxation times obtained for a magnetic sample prepared from **1**·2THF as described above (with 1 $\sigma$  uncertainties). These data are reported to verify reproducibility of data collected for **1**. Orange circles correspond to relaxation times from magnetization decay, blue circles correspond to relaxation times from ac susceptibility measurements. (Lower) Expanded view of the ac region in the upper plot. Fit curve generated using fitted parameters in Table S7 with Eq 1 from the main text.

**Table S8.** Cartesian coordinates of the PBE and PBE0 optimized structures of the  $[\text{Dy}(\text{BC}_4\text{Ph}_5)_2]^-$  anion in 1:2THF.

|    | <b>1-PBE</b> |          |          | <b>1-PBE0</b> |          |          |
|----|--------------|----------|----------|---------------|----------|----------|
| Dy | -0.34436     | -0.23783 | -0.02990 | -0.33466      | -0.19237 | -0.04002 |
| C  | 1.23979      | 2.41515  | 2.08639  | 1.28871       | 2.37535  | 2.08167  |
| C  | 0.98129      | -0.15792 | 2.21921  | 0.93754       | -0.16858 | 2.21905  |
| C  | -2.89504     | -0.93085 | 2.23033  | -2.94438      | -0.80955 | 2.20391  |
| C  | -0.09890     | -1.11564 | 2.37760  | -0.16704      | -1.08519 | 2.35930  |
| C  | 0.10150      | -2.57534 | 2.43579  | -0.01190      | -2.54523 | 2.43087  |
| B  | -1.43299     | -0.34462 | 2.34964  | -1.46436      | -0.27537 | 2.31912  |
| C  | 0.43919      | 1.16771  | 2.06680  | 0.44706       | 1.16146  | 2.06255  |
| C  | -1.88190     | 2.31076  | 2.04499  | -1.81743      | 2.38097  | 2.00313  |
| C  | -1.00896     | 1.11996  | 2.09665  | -0.99203      | 1.16339  | 2.07026  |
| C  | -3.16676     | -2.09991 | 1.48283  | -3.25538      | -1.96763 | 1.47631  |
| H  | -2.33838     | -2.66684 | 1.04621  | -2.45328      | -2.56091 | 1.04395  |
| C  | 2.22147      | 2.62558  | 3.07293  | 2.25213       | 2.55869  | 3.07616  |
| H  | 2.41072      | 1.84283  | 3.80977  | 2.39838       | 1.78209  | 3.81858  |
| C  | 1.00874      | 3.45137  | 1.16606  | 1.11346       | 3.39862  | 1.15077  |
| H  | 0.24956      | 3.32345  | 0.39349  | 0.36787       | 3.29049  | 0.37205  |
| C  | 1.73700      | 4.63862  | 1.20877  | 1.87975       | 4.55103  | 1.19216  |
| H  | 1.53695      | 5.41189  | 0.46241  | 1.72306       | 5.31730  | 0.43909  |
| C  | 2.72108      | 4.82395  | 2.18257  | 2.84451       | 4.71134  | 2.17608  |
| H  | 3.30070      | 5.75022  | 2.21491  | 3.45268       | 5.61023  | 2.20835  |
| C  | 2.95490      | 3.81107  | 3.11641  | 3.02311       | 3.70919  | 3.11954  |
| H  | 3.71793      | 3.94277  | 3.88853  | 3.77161       | 3.82155  | 3.89838  |
| C  | -1.65924     | 3.43694  | 2.86510  | -1.56065      | 3.49580  | 2.81049  |
| H  | -0.80904     | 3.43229  | 3.54972  | -0.72080      | 3.46584  | 3.49555  |
| C  | -3.84396     | 3.46592  | 1.13736  | -3.71701      | 3.58991  | 1.08036  |
| H  | -4.69335     | 3.45910  | 0.44856  | -4.55686      | 3.60815  | 0.39183  |
| C  | -4.01515     | -0.27945 | 2.79352  | -4.02885      | -0.11621 | 2.75936  |
| H  | -3.85717     | 0.62901  | 3.38041  | -3.83692      | 0.78788  | 3.32896  |
| C  | -3.00521     | 2.35395  | 1.19435  | -2.92391      | 2.45651  | 1.15041  |
| H  | -3.22827     | 1.49141  | 0.56189  | -3.17131      | 1.60298  | 0.52750  |
| C  | -0.73396     | -3.37976 | 3.24082  | -0.87314      | -3.30999 | 3.22840  |
| H  | -1.49413     | -2.88888 | 3.85208  | -1.62143      | -2.79455 | 3.82067  |
| C  | -5.31429     | -0.75299 | 2.60977  | -5.33637      | -0.54322 | 2.58831  |
| H  | -6.15449     | -0.21862 | 3.06330  | -6.14976      | 0.02243  | 3.03475  |
| C  | -3.59187     | 4.57839  | 1.94373  | -3.43279      | 4.69086  | 1.87518  |
| H  | -4.24270     | 5.45545  | 1.89984  | -4.04774      | 5.58399  | 1.82142  |
| C  | -4.46432     | -2.57234 | 1.27650  | -4.56101      | -2.39459 | 1.28314  |
| H  | -4.62073     | -3.46719 | 0.66721  | -4.75094      | -3.28521 | 0.69074  |
| C  | -2.49693     | 4.54996  | 2.81265  | -2.35201      | 4.63054  | 2.74495  |
| H  | -2.28929     | 5.40812  | 3.45819  | -2.11904      | 5.47977  | 3.38104  |
| C  | -5.54985     | -1.89803 | 1.84090  | -5.61253      | -1.68153 | 1.84085  |
| H  | -6.56941     | -2.26195 | 1.68691  | -6.63772      | -2.01021 | 1.69740  |

|   |          |          |          |          |          |          |
|---|----------|----------|----------|----------|----------|----------|
| C | -0.61291 | -4.76761 | 3.25370  | -0.79222 | -4.69166 | 3.25731  |
| H | -1.28149 | -5.35899 | 3.88599  | -1.48000 | -5.25325 | 3.88335  |
| C | 1.08102  | -3.24270 | 1.66726  | 0.94800  | -3.24139 | 1.68415  |
| H | 1.76257  | -2.66428 | 1.03968  | 1.64560  | -2.69217 | 1.06083  |
| C | 0.35079  | -5.40707 | 2.46570  | 0.15561  | -5.36162 | 2.49274  |
| H | 0.43984  | -6.49641 | 2.47342  | 0.21376  | -6.44553 | 2.51298  |
| C | 1.20073  | -4.63159 | 1.67345  | 1.02858  | -4.62404 | 1.70618  |
| H | 1.95935  | -5.10060 | 1.04070  | 1.77512  | -5.11775 | 1.09088  |
| C | 2.42309  | -0.44830 | 2.38677  | 2.36306  | -0.50374 | 2.39770  |
| C | 3.40010  | 0.09808  | 1.53542  | 3.35325  | 0.00286  | 1.55497  |
| H | 3.09291  | 0.73763  | 0.70709  | 3.07226  | 0.64223  | 0.72668  |
| C | 2.86215  | -1.27451 | 3.43955  | 2.76385  | -1.33014 | 3.45083  |
| H | 2.12239  | -1.70486 | 4.11756  | 2.01039  | -1.73131 | 4.11989  |
| C | 4.75493  | -0.17175 | 1.71646  | 4.68935  | -0.30560 | 1.74555  |
| H | 5.47816  | 0.26354  | 1.02178  | 5.42582  | 0.09967  | 1.05831  |
| C | 4.21754  | -1.54861 | 3.62080  | 4.09996  | -1.64325 | 3.64249  |
| H | 4.52905  | -2.19802 | 4.44376  | 4.38370  | -2.29270 | 4.46558  |
| C | 5.17329  | -1.00241 | 2.75957  | 5.07126  | -1.13551 | 2.79036  |
| H | 6.23451  | -1.22413 | 2.89961  | 6.11706  | -1.38701 | 2.93862  |
| C | -1.15223 | -2.43761 | -2.29825 | -1.19887 | -2.40958 | -2.29139 |
| C | -0.89096 | 0.11602  | -2.47329 | -0.85124 | 0.11510  | -2.47402 |
| C | 2.93424  | 0.98180  | -2.02451 | 2.97716  | 0.86126  | -2.00824 |
| C | 0.14519  | 1.10972  | -2.28461 | 0.20696  | 1.07235  | -2.29435 |
| C | -0.06767 | 2.57082  | -2.39519 | 0.04043  | 2.53342  | -2.41671 |
| B | 1.48231  | 0.36571  | -2.07213 | 1.50930  | 0.29357  | -2.06918 |
| C | -0.33618 | -1.20862 | -2.34504 | -0.34486 | -1.21147 | -2.32814 |
| C | 1.98285  | -2.29355 | -2.03074 | 1.91842  | -2.36839 | -1.98435 |
| C | 1.08247  | -1.12780 | -2.05804 | 1.06256  | -1.17619 | -2.03568 |
| C | 3.23006  | 2.17691  | -1.33660 | 3.29649  | 2.04755  | -1.33750 |
| H | 2.43213  | 2.69738  | -0.80362 | 2.51189  | 2.59669  | -0.82899 |
| C | -2.20841 | -2.67150 | -3.20383 | -2.22688 | -2.61060 | -3.21945 |
| H | -2.39299 | -1.94512 | -3.99765 | -2.36301 | -1.88656 | -4.01524 |
| C | -0.92739 | -3.40830 | -1.29825 | -1.03623 | -3.36963 | -1.28602 |
| H | -0.08875 | -3.29686 | -0.60579 | -0.22153 | -3.27933 | -0.57374 |
| C | -1.74018 | -4.53580 | -1.17901 | -1.88383 | -4.46191 | -1.18469 |
| H | -1.54068 | -5.25012 | -0.37605 | -1.73333 | -5.17252 | -0.37781 |
| C | -2.79368 | -4.73622 | -2.07183 | -2.90868 | -4.63312 | -2.10176 |
| H | -3.43439 | -5.61701 | -1.98298 | -3.57589 | -5.48603 | -2.02703 |
| C | -3.01400 | -3.80128 | -3.09050 | -3.06761 | -3.70494 | -3.12477 |
| H | -3.82771 | -3.95463 | -3.80460 | -3.86012 | -3.83455 | -3.85585 |
| C | 1.83299  | -3.37891 | -2.92072 | 1.73822  | -3.45256 | -2.85246 |
| H | 1.01802  | -3.35914 | -3.64739 | 0.93437  | -3.41689 | -3.57980 |
| C | 3.93951  | -3.43526 | -1.10149 | 3.81449  | -3.55228 | -1.02929 |
| H | 4.75949  | -3.43920 | -0.37802 | 4.62344  | -3.57276 | -0.30484 |
| C | 4.00999  | 0.36354  | -2.69643 | 4.03354  | 0.20217  | -2.64898 |

|   |          |          |          |          |          |          |
|---|----------|----------|----------|----------|----------|----------|
| H | 3.82884  | -0.56203 | -3.24919 | 3.83166  | -0.72006 | -3.18530 |
| C | 3.06889  | -2.34885 | -1.13249 | 2.98665  | -2.44491 | -1.08339 |
| H | 3.22531  | -1.51631 | -0.44385 | 3.16425  | -1.61267 | -0.41141 |
| C | 0.78636  | 3.33728  | -3.21305 | 0.91578  | 3.26050  | -3.22998 |
| H | 1.57730  | 2.82426  | -3.76361 | 1.68797  | 2.72192  | -3.76817 |
| C | 5.30168  | 0.89312  | -2.66655 | 5.33255  | 0.68756  | -2.60746 |
| H | 6.11005  | 0.38038  | -3.19675 | 6.12663  | 0.14498  | -3.11361 |
| C | 3.76020  | -4.51038 | -1.97741 | 3.60668  | -4.62634 | -1.88474 |
| H | 4.43822  | -5.36732 | -1.95219 | 4.25095  | -5.49914 | -1.84195 |
| C | 4.51864  | 2.70923  | -1.29032 | 4.59226  | 2.53598  | -1.27910 |
| H | 4.70117  | 3.62563  | -0.72141 | 4.79481  | 3.44838  | -0.72508 |
| C | 2.70355  | -4.46790 | -2.89121 | 2.56544  | -4.56295 | -2.80037 |
| H | 2.55393  | -5.29367 | -3.59295 | 2.39360  | -5.38835 | -3.48568 |
| C | 5.56657  | 2.06685  | -1.95554 | 5.62153  | 1.85542  | -1.91506 |
| H | 6.57994  | 2.47694  | -1.92103 | 6.63978  | 2.23151  | -1.87164 |
| C | 0.65073  | 4.72204  | -3.30913 | 0.82446  | 4.63897  | -3.33683 |
| H | 1.33762  | 5.28603  | -3.94653 | 1.52664  | 5.17283  | -3.97083 |
| C | -1.07140 | 3.26537  | -1.69115 | -0.93655 | 3.25797  | -1.72630 |
| H | -1.75445 | 2.71941  | -1.03680 | -1.63494 | 2.74217  | -1.07554 |
| C | -0.34626 | 5.38976  | -2.59202 | -0.14816 | 5.33794  | -2.63445 |
| H | -0.44551 | 6.47620  | -2.66080 | -0.21343 | 6.41895  | -2.71186 |
| C | -1.20959 | 4.64970  | -1.78086 | -1.03076 | 4.63627  | -1.82617 |
| H | -1.98680 | 5.14505  | -1.19254 | -1.78972 | 5.15674  | -1.24960 |
| C | -2.33907 | 0.42002  | -2.51202 | -2.28526 | 0.45907  | -2.51167 |
| C | -3.23516 | -0.17796 | -1.60066 | -3.18662 | -0.10650 | -1.60180 |
| H | -2.90738 | -0.97799 | -0.92645 | -2.88155 | -0.90935 | -0.93244 |
| C | -2.86390 | 1.38545  | -3.39451 | -2.78075 | 1.42808  | -3.39052 |
| H | -2.19206 | 1.86590  | -4.10772 | -2.10174 | 1.88495  | -4.10124 |
| C | -4.58183 | 0.18588  | -1.54518 | -4.51434 | 0.29150  | -1.54347 |
| H | -5.22928 | -0.28921 | -0.80404 | -5.16742 | -0.15965 | -0.80302 |
| C | -4.20986 | 1.73928  | -3.35256 | -4.10752 | 1.81597  | -3.34655 |
| H | -4.58820 | 2.49246  | -4.04888 | -4.46468 | 2.57198  | -4.03935 |
| C | -5.07530 | 1.15127  | -2.42240 | -4.98032 | 1.25909  | -2.41763 |
| H | -6.12762 | 1.44341  | -2.38584 | -6.01692 | 1.57845  | -2.37953 |

---

**Table S9.** Normal mode frequencies ( $\text{cm}^{-1}$ ) and transition intensities ( $\text{km mol}^{-1}$ ) of the vibrational modes of **1-PBE**.

| Mode | Frequency ( $\text{cm}^{-1}$ ) | Transition intensity ( $\text{km mol}^{-1}$ ) | Mode | Frequency ( $\text{cm}^{-1}$ ) | Transition intensity ( $\text{km mol}^{-1}$ ) | Mode | Frequency ( $\text{cm}^{-1}$ ) | Transition intensity ( $\text{km mol}^{-1}$ ) |
|------|--------------------------------|-----------------------------------------------|------|--------------------------------|-----------------------------------------------|------|--------------------------------|-----------------------------------------------|
| 1    | 13.618                         | 0.751                                         | 120  | 725.549                        | 10.232                                        | 239  | 1264.483                       | 31.344                                        |
| 2    | 24.144                         | 0.181                                         | 121  | 725.927                        | 12.957                                        | 240  | 1278.342                       | 2.231                                         |
| 3    | 25.629                         | 0.166                                         | 122  | 730.005                        | 16.494                                        | 241  | 1279.631                       | 1.262                                         |
| 4    | 29.330                         | 0.031                                         | 123  | 731.142                        | 9.359                                         | 242  | 1280.357                       | 1.520                                         |
| 5    | 29.541                         | 0.164                                         | 124  | 746.077                        | 2.942                                         | 243  | 1281.343                       | 1.705                                         |
| 6    | 31.323                         | 0.350                                         | 125  | 747.638                        | 0.976                                         | 244  | 1282.650                       | 2.246                                         |
| 7    | 32.207                         | 0.197                                         | 126  | 751.443                        | 5.788                                         | 245  | 1284.385                       | 0.808                                         |
| 8    | 37.325                         | 1.075                                         | 127  | 755.446                        | 8.256                                         | 246  | 1286.306                       | 5.757                                         |
| 9    | 40.000                         | 0.801                                         | 128  | 759.224                        | 12.752                                        | 247  | 1289.557                       | 5.617                                         |
| 10   | 40.576                         | 1.176                                         | 129  | 760.197                        | 24.317                                        | 248  | 1293.258                       | 2.459                                         |
| 11   | 42.904                         | 1.357                                         | 130  | 761.569                        | 14.778                                        | 249  | 1296.491                       | 9.180                                         |
| 12   | 45.033                         | 0.115                                         | 131  | 762.928                        | 18.700                                        | 250  | 1307.327                       | 2.021                                         |
| 13   | 49.650                         | 0.021                                         | 132  | 778.276                        | 17.171                                        | 251  | 1311.470                       | 7.991                                         |
| 14   | 51.249                         | 0.058                                         | 133  | 780.011                        | 23.301                                        | 252  | 1324.172                       | 1.543                                         |
| 15   | 52.928                         | 0.549                                         | 134  | 826.261                        | 0.700                                         | 253  | 1325.323                       | 0.649                                         |
| 16   | 55.547                         | 0.224                                         | 135  | 828.014                        | 0.536                                         | 254  | 1328.122                       | 0.227                                         |
| 17   | 56.164                         | 0.350                                         | 136  | 829.832                        | 0.850                                         | 255  | 1328.571                       | 4.925                                         |
| 18   | 57.753                         | 0.010                                         | 137  | 830.933                        | 0.664                                         | 256  | 1329.157                       | 5.228                                         |
| 19   | 60.000                         | 0.217                                         | 138  | 831.904                        | 0.789                                         | 257  | 1330.933                       | 1.561                                         |
| 20   | 62.770                         | 2.966                                         | 139  | 832.539                        | 0.646                                         | 258  | 1331.833                       | 0.207                                         |
| 21   | 75.173                         | 0.335                                         | 140  | 833.176                        | 0.544                                         | 259  | 1332.290                       | 2.988                                         |
| 22   | 77.843                         | 3.125                                         | 141  | 833.873                        | 1.065                                         | 260  | 1334.900                       | 0.545                                         |
| 23   | 79.870                         | 0.176                                         | 142  | 836.468                        | 0.369                                         | 261  | 1335.332                       | 1.646                                         |
| 24   | 82.410                         | 0.102                                         | 143  | 838.692                        | 1.302                                         | 262  | 1343.561                       | 9.792                                         |
| 25   | 84.512                         | 0.101                                         | 144  | 880.094                        | 2.824                                         | 263  | 1346.709                       | 14.385                                        |
| 26   | 93.777                         | 0.047                                         | 145  | 880.986                        | 2.227                                         | 264  | 1351.649                       | 10.198                                        |
| 27   | 96.056                         | 0.238                                         | 146  | 886.322                        | 4.584                                         | 265  | 1353.686                       | 189.023                                       |
| 28   | 101.202                        | 0.906                                         | 147  | 886.544                        | 1.928                                         | 266  | 1370.348                       | 30.682                                        |
| 29   | 105.743                        | 3.118                                         | 148  | 886.989                        | 0.363                                         | 267  | 1376.485                       | 13.324                                        |
| 30   | 108.747                        | 1.185                                         | 149  | 888.253                        | 3.402                                         | 268  | 1411.427                       | 3.812                                         |
| 31   | 114.694                        | 1.047                                         | 150  | 888.613                        | 5.644                                         | 269  | 1412.766                       | 6.879                                         |
| 32   | 140.566                        | 4.457                                         | 151  | 889.303                        | 1.550                                         | 270  | 1423.416                       | 0.599                                         |
| 33   | 140.978                        | 0.297                                         | 152  | 891.434                        | 0.814                                         | 271  | 1424.396                       | 6.609                                         |
| 34   | 152.034                        | 0.746                                         | 153  | 892.465                        | 13.221                                        | 272  | 1424.562                       | 2.366                                         |
| 35   | 162.174                        | 2.063                                         | 154  | 893.099                        | 14.736                                        | 273  | 1425.297                       | 2.253                                         |
| 36   | 167.027                        | 0.241                                         | 155  | 893.608                        | 0.344                                         | 274  | 1426.720                       | 7.706                                         |
| 37   | 172.612                        | 3.808                                         | 156  | 909.188                        | 0.260                                         | 275  | 1427.543                       | 11.986                                        |
| 38   | 174.561                        | 4.714                                         | 157  | 912.978                        | 0.433                                         | 276  | 1428.029                       | 10.611                                        |
| 39   | 198.271                        | 11.290                                        | 158  | 926.218                        | 0.751                                         | 277  | 1429.609                       | 4.450                                         |
| 40   | 201.311                        | 14.209                                        | 159  | 930.282                        | 1.098                                         | 278  | 1465.407                       | 9.074                                         |
| 41   | 202.163                        | 1.890                                         | 160  | 932.572                        | 0.941                                         | 279  | 1469.201                       | 9.750                                         |
| 42   | 217.865                        | 0.016                                         | 161  | 933.522                        | 0.986                                         | 280  | 1469.711                       | 11.964                                        |
| 43   | 218.835                        | 0.113                                         | 162  | 935.692                        | 1.043                                         | 281  | 1470.937                       | 22.344                                        |
| 44   | 220.457                        | 1.111                                         | 163  | 935.862                        | 0.846                                         | 282  | 1471.710                       | 77.459                                        |
| 45   | 221.847                        | 0.538                                         | 164  | 937.332                        | 0.862                                         | 283  | 1472.426                       | 57.531                                        |

---

|    |         |        |     |          |        |     |          |         |
|----|---------|--------|-----|----------|--------|-----|----------|---------|
| 46 | 224.822 | 0.307  | 165 | 937.606  | 1.121  | 284 | 1473.737 | 91.297  |
| 47 | 227.713 | 0.631  | 166 | 940.099  | 0.453  | 285 | 1475.761 | 42.424  |
| 48 | 234.161 | 0.679  | 167 | 944.529  | 0.322  | 286 | 1477.648 | 38.960  |
| 49 | 235.436 | 0.213  | 168 | 945.164  | 1.071  | 287 | 1481.044 | 23.630  |
| 50 | 241.850 | 1.348  | 169 | 948.504  | 1.569  | 288 | 1552.529 | 0.664   |
| 51 | 243.669 | 0.134  | 170 | 950.709  | 0.757  | 289 | 1556.655 | 2.448   |
| 52 | 244.445 | 0.269  | 171 | 951.726  | 5.048  | 290 | 1557.115 | 0.508   |
| 53 | 247.050 | 0.063  | 172 | 953.566  | 0.431  | 291 | 1558.310 | 1.505   |
| 54 | 261.343 | 1.191  | 173 | 953.935  | 0.583  | 292 | 1558.754 | 3.839   |
| 55 | 263.608 | 1.202  | 174 | 954.490  | 3.434  | 293 | 1559.753 | 0.888   |
| 56 | 276.227 | 0.483  | 175 | 955.371  | 0.871  | 294 | 1560.578 | 1.744   |
| 57 | 278.477 | 0.264  | 176 | 957.630  | 0.736  | 295 | 1562.040 | 1.772   |
| 58 | 355.076 | 9.971  | 177 | 959.171  | 1.583  | 296 | 1564.199 | 1.766   |
| 59 | 365.273 | 22.381 | 178 | 984.101  | 0.124  | 297 | 1566.834 | 1.186   |
| 60 | 395.986 | 0.117  | 179 | 984.667  | 0.180  | 298 | 1579.083 | 13.012  |
| 61 | 399.250 | 0.104  | 180 | 985.268  | 0.578  | 299 | 1584.070 | 13.754  |
| 62 | 402.446 | 0.140  | 181 | 986.044  | 0.068  | 300 | 1585.138 | 8.283   |
| 63 | 403.533 | 2.313  | 182 | 986.535  | 2.352  | 301 | 1586.933 | 38.059  |
| 64 | 404.786 | 4.763  | 183 | 986.669  | 0.087  | 302 | 1586.981 | 68.397  |
| 65 | 405.531 | 1.566  | 184 | 988.261  | 0.048  | 303 | 1588.002 | 17.067  |
| 66 | 407.484 | 2.021  | 185 | 988.952  | 0.621  | 304 | 1588.387 | 103.618 |
| 67 | 408.360 | 0.452  | 186 | 989.217  | 0.017  | 305 | 1590.115 | 27.221  |
| 68 | 409.605 | 1.116  | 187 | 990.519  | 0.325  | 306 | 1591.301 | 12.777  |
| 69 | 410.949 | 1.600  | 188 | 1002.558 | 7.415  | 307 | 1593.460 | 21.853  |
| 70 | 411.265 | 1.949  | 189 | 1003.048 | 1.140  | 308 | 3034.419 | 7.807   |
| 71 | 412.464 | 1.710  | 190 | 1021.924 | 27.785 | 309 | 3057.728 | 2.073   |
| 72 | 416.541 | 8.649  | 191 | 1022.144 | 34.691 | 310 | 3057.906 | 5.214   |
| 73 | 422.326 | 4.398  | 192 | 1022.758 | 4.428  | 311 | 3063.702 | 0.990   |
| 74 | 477.813 | 0.028  | 193 | 1022.963 | 3.025  | 312 | 3064.275 | 4.892   |
| 75 | 478.912 | 0.035  | 194 | 1024.325 | 0.067  | 313 | 3065.232 | 2.341   |
| 76 | 494.081 | 0.477  | 195 | 1025.099 | 2.007  | 314 | 3066.054 | 4.902   |
| 77 | 497.087 | 0.212  | 196 | 1025.949 | 2.006  | 315 | 3066.783 | 2.897   |
| 78 | 502.614 | 1.097  | 197 | 1026.165 | 0.092  | 316 | 3067.286 | 3.224   |
| 79 | 508.426 | 2.481  | 198 | 1036.469 | 0.145  | 317 | 3068.146 | 1.566   |
| 80 | 521.968 | 9.151  | 199 | 1037.388 | 0.036  | 318 | 3070.075 | 14.139  |
| 81 | 524.080 | 1.117  | 200 | 1060.670 | 0.752  | 319 | 3070.409 | 3.324   |
| 82 | 529.163 | 4.472  | 201 | 1060.852 | 0.723  | 320 | 3074.130 | 4.442   |
| 83 | 531.745 | 6.109  | 202 | 1065.944 | 2.657  | 321 | 3074.556 | 11.718  |
| 84 | 539.841 | 21.055 | 203 | 1067.318 | 0.749  | 322 | 3075.668 | 15.785  |
| 85 | 542.496 | 6.294  | 204 | 1069.848 | 7.450  | 323 | 3076.005 | 14.223  |
| 86 | 545.458 | 15.032 | 205 | 1070.327 | 3.535  | 324 | 3076.468 | 6.894   |
| 87 | 550.024 | 5.174  | 206 | 1072.342 | 10.590 | 325 | 3077.519 | 12.601  |
| 88 | 606.455 | 1.922  | 207 | 1073.715 | 25.046 | 326 | 3077.949 | 8.426   |
| 89 | 606.815 | 0.233  | 208 | 1074.478 | 0.729  | 327 | 3081.037 | 23.003  |
| 90 | 607.233 | 0.957  | 209 | 1076.276 | 5.754  | 328 | 3081.231 | 10.344  |
| 91 | 608.079 | 0.552  | 210 | 1098.488 | 7.853  | 329 | 3083.522 | 33.033  |
| 92 | 609.111 | 2.723  | 211 | 1100.869 | 4.407  | 330 | 3086.936 | 15.071  |
| 93 | 610.420 | 0.087  | 212 | 1104.909 | 4.991  | 331 | 3087.342 | 43.515  |
| 94 | 611.519 | 0.006  | 213 | 1105.669 | 12.024 | 332 | 3087.882 | 17.512  |
| 95 | 612.047 | 0.192  | 214 | 1138.208 | 0.811  | 333 | 3088.594 | 12.090  |

---

|     |         |        |     |          |        |     |          |        |
|-----|---------|--------|-----|----------|--------|-----|----------|--------|
| 96  | 612.853 | 1.847  | 215 | 1138.535 | 0.788  | 334 | 3089.483 | 33.262 |
| 97  | 613.216 | 1.112  | 216 | 1138.783 | 0.542  | 335 | 3090.000 | 35.757 |
| 98  | 622.085 | 0.452  | 217 | 1138.904 | 0.853  | 336 | 3091.482 | 40.811 |
| 99  | 623.845 | 0.037  | 218 | 1139.685 | 0.346  | 337 | 3091.597 | 23.043 |
| 100 | 635.246 | 3.258  | 219 | 1139.775 | 0.762  | 338 | 3094.339 | 23.564 |
| 101 | 637.118 | 2.027  | 220 | 1140.278 | 1.516  | 339 | 3094.667 | 41.969 |
| 102 | 637.772 | 0.482  | 221 | 1140.945 | 0.590  | 340 | 3095.132 | 26.182 |
| 103 | 652.345 | 0.843  | 222 | 1142.450 | 1.306  | 341 | 3096.411 | 24.776 |
| 104 | 654.602 | 2.325  | 223 | 1142.891 | 1.577  | 342 | 3097.406 | 11.217 |
| 105 | 657.581 | 7.041  | 224 | 1143.496 | 1.176  | 343 | 3098.354 | 13.090 |
| 106 | 660.088 | 11.161 | 225 | 1146.564 | 0.781  | 344 | 3099.540 | 20.124 |
| 107 | 661.177 | 29.563 | 226 | 1165.358 | 1.776  | 345 | 3099.660 | 12.657 |
| 108 | 662.271 | 12.116 | 227 | 1166.556 | 2.484  | 346 | 3102.065 | 19.953 |
| 109 | 685.747 | 0.389  | 228 | 1167.231 | 3.882  | 347 | 3103.213 | 8.115  |
| 110 | 692.063 | 28.988 | 229 | 1167.637 | 3.447  | 348 | 3103.624 | 21.328 |
| 111 | 692.455 | 24.343 | 230 | 1169.135 | 6.578  | 349 | 3103.982 | 2.233  |
| 112 | 692.609 | 4.437  | 231 | 1170.214 | 3.828  | 350 | 3104.295 | 12.589 |
| 113 | 693.379 | 48.600 | 232 | 1171.298 | 2.289  | 351 | 3105.557 | 13.737 |
| 114 | 694.914 | 30.030 | 233 | 1171.470 | 4.548  | 352 | 3106.204 | 19.140 |
| 115 | 696.087 | 18.681 | 234 | 1173.084 | 1.920  | 353 | 3106.258 | 13.772 |
| 116 | 696.193 | 36.071 | 235 | 1173.268 | 1.823  | 354 | 3106.449 | 9.044  |
| 117 | 697.145 | 93.803 | 236 | 1194.666 | 1.160  | 355 | 3111.286 | 10.084 |
| 118 | 698.820 | 27.503 | 237 | 1196.521 | 0.063  | 356 | 3112.441 | 2.285  |
| 119 | 700.787 | 74.588 | 238 | 1253.799 | 11.425 | 357 | 3112.753 | 3.589  |

**Table S10.** Normal mode frequencies ( $\text{cm}^{-1}$ ) and transition intensities ( $\text{km mol}^{-1}$ ) of the vibrational modes of **1-PBE0**.

| Mode | Frequency ( $\text{cm}^{-1}$ ) | Transition intensity ( $\text{km mol}^{-1}$ ) | Mode | Frequency ( $\text{cm}^{-1}$ ) | Transition intensity ( $\text{km mol}^{-1}$ ) | Mode | Frequency ( $\text{cm}^{-1}$ ) | Transition intensity ( $\text{km mol}^{-1}$ ) |
|------|--------------------------------|-----------------------------------------------|------|--------------------------------|-----------------------------------------------|------|--------------------------------|-----------------------------------------------|
| 1    | 14.799                         | 0.632                                         | 120  | 752.763                        | 8.292                                         | 239  | 1309.753                       | 31.275                                        |
| 2    | 24.451                         | 0.195                                         | 121  | 753.874                        | 13.140                                        | 240  | 1317.025                       | 1.921                                         |
| 3    | 26.727                         | 0.131                                         | 122  | 758.700                        | 14.313                                        | 241  | 1319.293                       | 0.358                                         |
| 4    | 29.744                         | 0.017                                         | 123  | 760.119                        | 6.973                                         | 242  | 1320.924                       | 1.032                                         |
| 5    | 30.791                         | 0.155                                         | 124  | 779.341                        | 1.610                                         | 243  | 1321.696                       | 0.677                                         |
| 6    | 32.698                         | 0.642                                         | 125  | 781.117                        | 1.975                                         | 244  | 1322.074                       | 0.954                                         |
| 7    | 33.277                         | 0.271                                         | 126  | 786.624                        | 5.302                                         | 245  | 1325.410                       | 5.876                                         |
| 8    | 37.204                         | 0.974                                         | 127  | 789.315                        | 25.620                                        | 246  | 1325.798                       | 1.436                                         |
| 9    | 40.171                         | 0.456                                         | 128  | 791.673                        | 27.695                                        | 247  | 1328.862                       | 3.796                                         |
| 10   | 41.996                         | 2.292                                         | 129  | 792.966                        | 8.405                                         | 248  | 1338.481                       | 6.165                                         |
| 11   | 43.350                         | 0.732                                         | 130  | 793.615                        | 16.247                                        | 249  | 1343.749                       | 24.558                                        |
| 12   | 45.666                         | 0.167                                         | 131  | 794.920                        | 25.940                                        | 250  | 1356.410                       | 1.136                                         |
| 13   | 50.605                         | 0.017                                         | 132  | 812.439                        | 24.546                                        | 251  | 1356.973                       | 0.487                                         |
| 14   | 52.912                         | 0.035                                         | 133  | 814.033                        | 29.536                                        | 252  | 1357.783                       | 1.322                                         |
| 15   | 54.103                         | 0.825                                         | 134  | 866.640                        | 0.721                                         | 253  | 1358.860                       | 0.486                                         |
| 16   | 56.823                         | 0.202                                         | 135  | 868.118                        | 0.960                                         | 254  | 1359.394                       | 0.809                                         |
| 17   | 57.524                         | 0.434                                         | 136  | 868.424                        | 0.410                                         | 255  | 1359.715                       | 1.146                                         |
| 18   | 59.524                         | 0.003                                         | 137  | 871.133                        | 0.391                                         | 256  | 1360.023                       | 0.722                                         |
| 19   | 61.509                         | 0.047                                         | 138  | 871.642                        | 1.017                                         | 257  | 1361.358                       | 0.967                                         |
| 20   | 64.116                         | 3.730                                         | 139  | 872.037                        | 0.431                                         | 258  | 1361.777                       | 2.206                                         |
| 21   | 76.200                         | 1.237                                         | 140  | 872.794                        | 0.917                                         | 259  | 1363.148                       | 1.169                                         |
| 22   | 77.962                         | 3.645                                         | 141  | 874.367                        | 0.795                                         | 260  | 1364.181                       | 0.393                                         |
| 23   | 81.525                         | 0.192                                         | 142  | 876.250                        | 0.572                                         | 261  | 1365.626                       | 4.794                                         |
| 24   | 84.327                         | 0.189                                         | 143  | 878.971                        | 1.197                                         | 262  | 1395.722                       | 11.256                                        |
| 25   | 86.053                         | 0.114                                         | 144  | 922.739                        | 1.629                                         | 263  | 1401.778                       | 10.878                                        |
| 26   | 96.419                         | 0.028                                         | 145  | 924.603                        | 0.426                                         | 264  | 1407.616                       | 16.666                                        |
| 27   | 99.035                         | 0.197                                         | 146  | 928.881                        | 2.296                                         | 265  | 1409.778                       | 186.686                                       |
| 28   | 103.980                        | 0.917                                         | 147  | 929.511                        | 3.124                                         | 266  | 1430.250                       | 18.531                                        |
| 29   | 108.293                        | 3.489                                         | 148  | 934.036                        | 2.478                                         | 267  | 1437.265                       | 6.183                                         |
| 30   | 112.483                        | 1.225                                         | 149  | 934.405                        | 0.908                                         | 268  | 1462.297                       | 5.458                                         |
| 31   | 118.425                        | 1.250                                         | 150  | 934.678                        | 6.078                                         | 269  | 1463.530                       | 9.229                                         |
| 32   | 145.154                        | 2.641                                         | 151  | 937.255                        | 7.118                                         | 270  | 1474.995                       | 0.442                                         |
| 33   | 146.100                        | 1.600                                         | 152  | 937.307                        | 1.101                                         | 271  | 1476.010                       | 8.546                                         |
| 34   | 159.155                        | 0.609                                         | 153  | 938.158                        | 2.157                                         | 272  | 1476.444                       | 3.130                                         |
| 35   | 170.267                        | 2.290                                         | 154  | 940.719                        | 14.099                                        | 273  | 1477.127                       | 1.259                                         |
| 36   | 175.444                        | 0.247                                         | 155  | 941.404                        | 15.678                                        | 274  | 1479.012                       | 12.399                                        |
| 37   | 180.617                        | 4.644                                         | 156  | 943.098                        | 1.446                                         | 275  | 1480.024                       | 16.682                                        |
| 38   | 182.922                        | 3.354                                         | 157  | 946.564                        | 0.499                                         | 276  | 1481.983                       | 12.657                                        |
| 39   | 205.176                        | 3.116                                         | 158  | 979.418                        | 0.711                                         | 277  | 1483.556                       | 4.295                                         |
| 40   | 208.353                        | 5.054                                         | 159  | 984.400                        | 1.112                                         | 278  | 1521.316                       | 7.386                                         |
| 41   | 210.017                        | 21.832                                        | 160  | 985.893                        | 0.446                                         | 279  | 1524.610                       | 2.784                                         |
| 42   | 225.392                        | 0.054                                         | 161  | 986.210                        | 1.703                                         | 280  | 1527.100                       | 20.431                                        |
| 43   | 226.105                        | 0.065                                         | 162  | 988.182                        | 0.550                                         | 281  | 1528.588                       | 20.349                                        |
| 44   | 229.044                        | 1.180                                         | 163  | 988.312                        | 0.938                                         | 282  | 1529.418                       | 83.900                                        |
| 45   | 229.454                        | 0.105                                         | 164  | 988.952                        | 1.276                                         | 283  | 1529.953                       | 32.323                                        |



|    |         |        |     |          |        |     |          |         |
|----|---------|--------|-----|----------|--------|-----|----------|---------|
| 46 | 233.492 | 0.621  | 165 | 991.085  | 0.581  | 284 | 1531.336 | 128.956 |
| 47 | 237.402 | 0.680  | 166 | 992.800  | 0.487  | 285 | 1533.477 | 80.374  |
| 48 | 242.324 | 0.787  | 167 | 996.729  | 1.502  | 286 | 1537.334 | 53.974  |
| 49 | 243.835 | 0.375  | 168 | 997.051  | 0.032  | 287 | 1540.997 | 27.730  |
| 50 | 251.162 | 1.494  | 169 | 1000.003 | 0.893  | 288 | 1622.215 | 0.664   |
| 51 | 253.442 | 0.264  | 170 | 1000.677 | 1.393  | 289 | 1626.019 | 0.321   |
| 52 | 254.838 | 0.177  | 171 | 1002.595 | 0.409  | 290 | 1627.168 | 2.987   |
| 53 | 257.766 | 0.031  | 172 | 1003.747 | 3.108  | 291 | 1628.678 | 1.913   |
| 54 | 270.616 | 1.473  | 173 | 1004.810 | 1.236  | 292 | 1629.703 | 0.459   |
| 55 | 272.595 | 1.067  | 174 | 1006.662 | 1.329  | 293 | 1630.290 | 6.006   |
| 56 | 285.644 | 0.542  | 175 | 1007.150 | 2.466  | 294 | 1630.677 | 0.993   |
| 57 | 288.275 | 0.336  | 176 | 1008.493 | 0.661  | 295 | 1631.341 | 1.824   |
| 58 | 371.503 | 10.786 | 177 | 1011.136 | 1.397  | 296 | 1634.917 | 1.644   |
| 59 | 382.066 | 27.552 | 178 | 1017.541 | 0.209  | 297 | 1637.165 | 1.166   |
| 60 | 413.451 | 0.096  | 179 | 1018.252 | 0.289  | 298 | 1650.519 | 10.543  |
| 61 | 416.751 | 0.180  | 180 | 1018.593 | 0.189  | 299 | 1654.897 | 8.858   |
| 62 | 419.308 | 0.801  | 181 | 1019.115 | 0.305  | 300 | 1655.894 | 14.399  |
| 63 | 420.266 | 4.423  | 182 | 1019.413 | 1.066  | 301 | 1658.012 | 72.058  |
| 64 | 421.155 | 4.309  | 183 | 1019.537 | 0.307  | 302 | 1658.345 | 51.699  |
| 65 | 422.028 | 1.129  | 184 | 1020.710 | 0.062  | 303 | 1659.000 | 87.514  |
| 66 | 424.833 | 2.313  | 185 | 1021.377 | 0.125  | 304 | 1659.267 | 30.427  |
| 67 | 425.699 | 0.153  | 186 | 1021.870 | 0.383  | 305 | 1661.605 | 30.068  |
| 68 | 426.736 | 0.833  | 187 | 1023.039 | 0.311  | 306 | 1662.762 | 14.183  |
| 69 | 427.618 | 1.898  | 188 | 1037.876 | 8.854  | 307 | 1665.181 | 21.211  |
| 70 | 428.694 | 0.217  | 189 | 1038.381 | 0.274  | 308 | 3127.429 | 9.023   |
| 71 | 430.164 | 1.073  | 190 | 1056.971 | 31.085 | 309 | 3146.623 | 1.369   |
| 72 | 434.203 | 9.088  | 191 | 1057.063 | 29.994 | 310 | 3146.863 | 4.523   |
| 73 | 440.506 | 4.707  | 192 | 1057.606 | 4.933  | 311 | 3152.736 | 3.405   |
| 74 | 497.130 | 0.013  | 193 | 1057.841 | 0.968  | 312 | 3152.908 | 0.858   |
| 75 | 498.423 | 0.087  | 194 | 1059.377 | 0.059  | 313 | 3153.638 | 1.864   |
| 76 | 514.691 | 0.450  | 195 | 1059.953 | 1.510  | 314 | 3154.355 | 4.172   |
| 77 | 517.902 | 0.200  | 196 | 1060.669 | 0.586  | 315 | 3155.069 | 2.575   |
| 78 | 523.230 | 0.934  | 197 | 1060.820 | 0.381  | 316 | 3155.822 | 2.419   |
| 79 | 529.861 | 3.014  | 198 | 1072.697 | 0.113  | 317 | 3156.591 | 1.106   |
| 80 | 541.575 | 9.237  | 199 | 1073.076 | 0.025  | 318 | 3158.973 | 2.509   |
| 81 | 543.148 | 0.888  | 200 | 1096.603 | 0.573  | 319 | 3159.541 | 12.806  |
| 82 | 547.923 | 4.214  | 201 | 1097.317 | 0.792  | 320 | 3162.654 | 3.765   |
| 83 | 550.542 | 5.423  | 202 | 1102.476 | 3.510  | 321 | 3163.834 | 10.959  |
| 84 | 561.664 | 25.259 | 203 | 1103.906 | 1.289  | 322 | 3164.676 | 14.580  |
| 85 | 564.832 | 6.792  | 204 | 1105.765 | 11.157 | 323 | 3165.315 | 16.414  |
| 86 | 567.653 | 13.154 | 205 | 1106.082 | 1.394  | 324 | 3166.076 | 5.706   |
| 87 | 573.763 | 4.864  | 206 | 1108.319 | 7.286  | 325 | 3166.603 | 7.144   |
| 88 | 625.838 | 1.923  | 207 | 1109.074 | 30.772 | 326 | 3166.786 | 11.985  |
| 89 | 625.972 | 0.076  | 208 | 1110.312 | 0.414  | 327 | 3170.011 | 24.485  |
| 90 | 626.435 | 0.852  | 209 | 1112.507 | 6.241  | 328 | 3170.137 | 5.118   |
| 91 | 627.475 | 0.400  | 210 | 1139.161 | 8.021  | 329 | 3173.055 | 31.106  |
| 92 | 628.343 | 2.476  | 211 | 1140.744 | 2.695  | 330 | 3176.260 | 15.200  |
| 93 | 629.681 | 0.048  | 212 | 1145.138 | 4.381  | 331 | 3176.830 | 33.146  |
| 94 | 630.820 | 0.007  | 213 | 1145.992 | 10.349 | 332 | 3177.272 | 10.851  |
| 95 | 631.311 | 0.149  | 214 | 1172.232 | 0.981  | 333 | 3177.613 | 50.332  |

|     |         |         |     |          |        |     |          |        |
|-----|---------|---------|-----|----------|--------|-----|----------|--------|
| 96  | 632.065 | 1.738   | 215 | 1172.617 | 0.316  | 334 | 3178.266 | 9.319  |
| 97  | 632.395 | 1.063   | 216 | 1172.746 | 2.111  | 335 | 3179.999 | 47.683 |
| 98  | 642.346 | 0.403   | 217 | 1172.919 | 0.624  | 336 | 3180.843 | 13.041 |
| 99  | 643.607 | 0.078   | 218 | 1173.445 | 0.642  | 337 | 3181.349 | 38.895 |
| 100 | 657.187 | 0.089   | 219 | 1173.708 | 0.421  | 338 | 3183.381 | 16.532 |
| 101 | 658.221 | 0.782   | 220 | 1174.077 | 1.355  | 339 | 3183.526 | 38.325 |
| 102 | 661.975 | 4.090   | 221 | 1174.684 | 0.199  | 340 | 3184.684 | 23.599 |
| 103 | 674.226 | 0.564   | 222 | 1175.980 | 1.640  | 341 | 3186.434 | 18.748 |
| 104 | 675.632 | 1.771   | 223 | 1177.574 | 1.342  | 342 | 3187.514 | 8.500  |
| 105 | 684.401 | 7.181   | 224 | 1186.000 | 0.157  | 343 | 3187.862 | 7.695  |
| 106 | 685.739 | 6.412   | 225 | 1189.043 | 0.545  | 344 | 3188.697 | 11.221 |
| 107 | 686.368 | 35.036  | 226 | 1202.684 | 1.491  | 345 | 3189.776 | 17.700 |
| 108 | 691.231 | 22.945  | 227 | 1204.600 | 1.655  | 346 | 3190.917 | 16.870 |
| 109 | 718.641 | 0.560   | 228 | 1204.913 | 3.541  | 347 | 3192.983 | 12.272 |
| 110 | 721.057 | 15.238  | 229 | 1205.206 | 2.579  | 348 | 3193.033 | 14.347 |
| 111 | 722.494 | 37.005  | 230 | 1206.261 | 2.377  | 349 | 3194.627 | 0.902  |
| 112 | 722.640 | 24.623  | 231 | 1206.409 | 3.993  | 350 | 3194.943 | 18.073 |
| 113 | 723.433 | 35.087  | 232 | 1207.041 | 4.501  | 351 | 3195.044 | 16.729 |
| 114 | 724.886 | 29.536  | 233 | 1208.844 | 3.183  | 352 | 3195.087 | 2.699  |
| 115 | 725.698 | 14.398  | 234 | 1209.230 | 1.278  | 353 | 3195.349 | 7.917  |
| 116 | 726.292 | 21.199  | 235 | 1210.366 | 2.438  | 354 | 3195.614 | 6.377  |
| 117 | 727.170 | 108.415 | 236 | 1241.849 | 2.071  | 355 | 3200.355 | 8.611  |
| 118 | 729.204 | 35.840  | 237 | 1244.154 | 0.543  | 356 | 3201.792 | 1.415  |
| 119 | 730.527 | 102.514 | 238 | 1302.789 | 20.529 | 357 | 3203.881 | 2.959  |

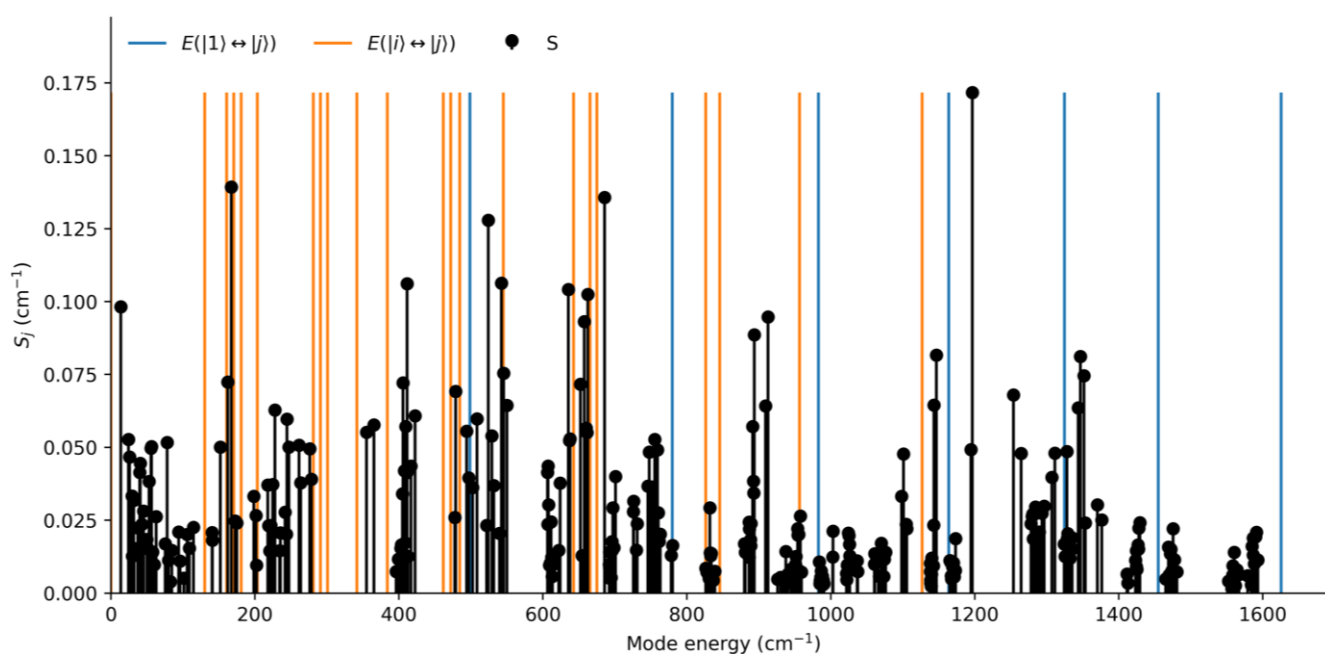

**Figure S25.** Vibrational coupling strength ( $S_j$ )<sup>20</sup> of each vibrational mode of **1-PBE** in the range of 0 to 1700  $\text{cm}^{-1}$ . Electronic energy states are shown in blue and transitions between states are given in orange.

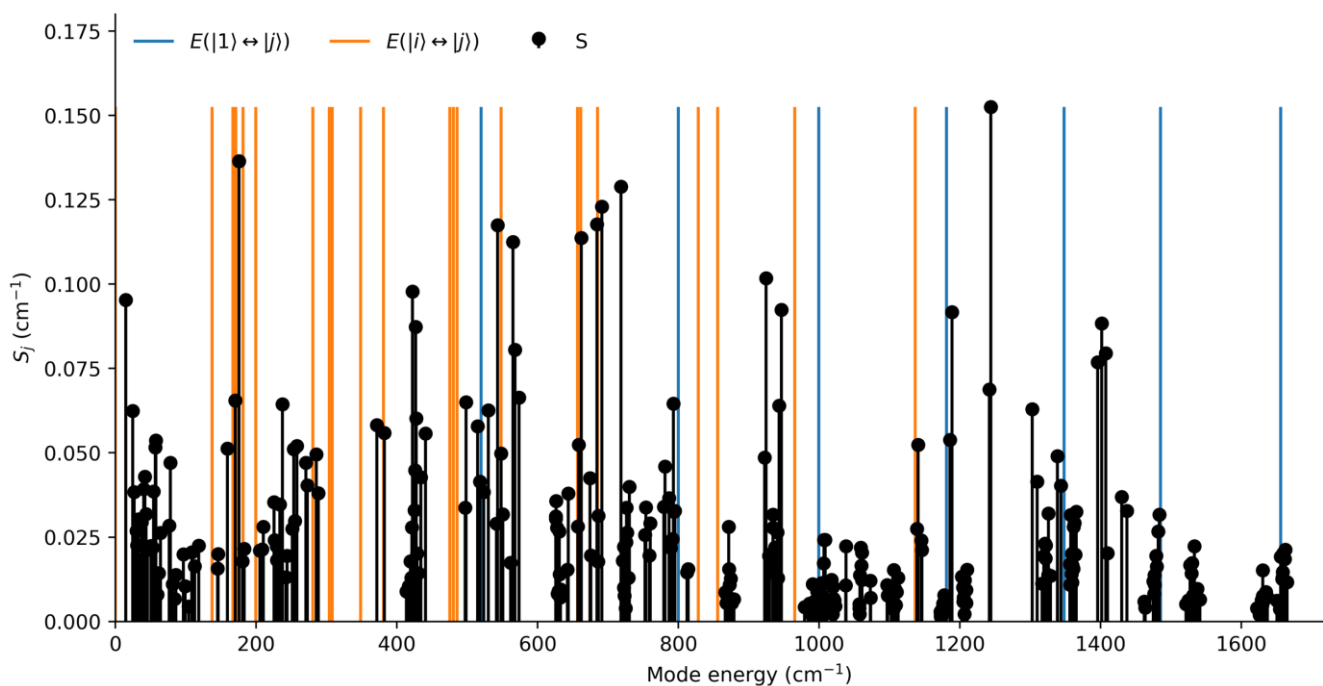

**Figure S26.** Vibrational coupling strength ( $S_j$ )<sup>20</sup> of each vibrational mode of **1-PBE0** in the range of 0 to 1700  $\text{cm}^{-1}$ . Electronic energy states are shown in blue and transitions between states are given in orange.

**Table S11.** Calculated electronic structure of one of the  $[\text{Dy}(\text{BC}_4\text{Ph}_5)_2]^-$  anions in **1·2THF**.

| Energy ( $\text{cm}^{-1}$ ) | CF Energy ( $\text{cm}^{-1}$ ) | $g_x$ | $g_y$ | $g_z$ | $\theta$ ( $^\circ$ ) | Wavefunction                                                          | $\langle J_z \rangle$ |
|-----------------------------|--------------------------------|-------|-------|-------|-----------------------|-----------------------------------------------------------------------|-----------------------|
| 0.00                        | 0.00                           | 0.00  | 0.00  | 20.00 | --                    | 100% $ \pm 15/2\rangle$                                               | $\pm 7.50$            |
| 555.22                      | 567.86                         | 0.00  | 0.00  | 17.02 | 1.95                  | 100% $ \pm 13/2\rangle$                                               | $\pm 6.50$            |
| 891.77                      | 885.11                         | 0.00  | 0.00  | 14.37 | 1.61                  | 99% $ \pm 11/2\rangle$                                                | $\pm 5.50$            |
| 1111.88                     | 1110.64                        | 0.03  | 0.03  | 11.77 | 5.41                  | 99% $ \pm 9/2\rangle$                                                 | $\pm 4.49$            |
| 1300.73                     | 1308.39                        | 0.38  | 0.41  | 9.05  | 9.52                  | 97% $ \pm 7/2\rangle$ + 2% $ \pm 3/2\rangle$                          | $\pm 3.45$            |
| 1476.28                     | 1485.66                        | 3.35  | 3.61  | 5.98  | 17.28                 | 88% $ \pm 5/2\rangle$ + 7% $ \pm 1/2\rangle$ + 2% $ \mp 3/2\rangle$   | $\pm 2.26$            |
| 1624.30                     | 1628.71                        | 2.39  | 5.34  | 10.84 | 87.55                 | 73% $ \pm 3/2\rangle$ + 17% $ \mp 1/2\rangle$ + 6% $ \mp 5/2\rangle$  | $\pm 0.95$            |
| 1790.59                     | 1787.05                        | 0.36  | 1.29  | 18.03 | 88.96                 | 65% $ \pm 1/2\rangle$ + 16% $ \mp 3/2\rangle$ + 10% $ \mp 1/2\rangle$ | $\pm 0.18$            |

**Table S12.** Calculated electronic structure of one of the  $[\text{Dy}(\text{BC}_4\text{Ph}_5)_2]^-$  anions in **1·2THF** using higher level methodology.

| Energy ( $\text{cm}^{-1}$ ) | CF Energy ( $\text{cm}^{-1}$ ) | $g_x$ | $g_y$ | $g_z$ | $\theta$ ( $^\circ$ ) | Wavefunction                                                          | $\langle J_z \rangle$ |
|-----------------------------|--------------------------------|-------|-------|-------|-----------------------|-----------------------------------------------------------------------|-----------------------|
| 0.00                        | 0.00                           | 0.00  | 0.00  | 19.90 | --                    | 100% $ \pm 15/2\rangle$                                               | $\pm 7.50$            |
| 542.59                      | 550.73                         | 0.00  | 0.00  | 16.99 | 2.03                  | 100% $ \pm 13/2\rangle$                                               | $\pm 6.50$            |
| 860.06                      | 855.64                         | 0.00  | 0.00  | 14.35 | 1.24                  | 99% $ \pm 11/2\rangle$                                                | $\pm 5.50$            |
| 1070.65                     | 1070.05                        | 0.03  | 0.03  | 11.76 | 5.67                  | 99% $ \pm 9/2\rangle$                                                 | $\pm 4.49$            |
| 1252.31                     | 1257.28                        | 0.41  | 0.44  | 9.04  | 9.52                  | 96% $ \pm 7/2\rangle$ + 2% $ \pm 3/2\rangle$                          | $\pm 3.44$            |
| 1419.20                     | 1425.18                        | 3.45  | 3.73  | 5.96  | 17.59                 | 87% $ \pm 5/2\rangle$ + 8% $ \pm 1/2\rangle$ + 2% $ \mp 3/2\rangle$   | $\pm 2.25$            |
| 1558.69                     | 1561.53                        | 2.37  | 5.23  | 10.93 | 87.59                 | 72% $ \pm 3/2\rangle$ + 17% $ \mp 1/2\rangle$ + 6% $ \mp 5/2\rangle$  | $\pm 0.94$            |
| 1715.26                     | 1712.98                        | 0.35  | 1.22  | 18.00 | 88.93                 | 64% $ \pm 1/2\rangle$ + 16% $ \mp 3/2\rangle$ + 10% $ \mp 1/2\rangle$ | $\pm 0.18$            |

**Table S13.** Electronic structure of **1-PBE**.

| Energy (cm <sup>-1</sup> ) | CF Energy (cm <sup>-1</sup> ) | $g_x$ | $g_y$ | $g_z$ | $\theta$ (°) | Wavefunction                                                         | $\langle J_z \rangle$ |
|----------------------------|-------------------------------|-------|-------|-------|--------------|----------------------------------------------------------------------|-----------------------|
| 0.00                       | 0.00                          | 0.00  | 0.00  | 20.00 | --           | 100% $ \pm 15/2\rangle$                                              | $\pm 7.50$            |
| 488.59                     | 498.50                        | 0.00  | 0.00  | 17.06 | 1.94         | 100% $ \pm 13/2\rangle$                                              | $\pm 6.50$            |
| 784.44                     | 779.74                        | 0.00  | 0.00  | 14.42 | 1.01         | 99% $ \pm 11/2\rangle$                                               | $\pm 5.50$            |
| 984.25                     | 982.90                        | 0.02  | 0.02  | 11.80 | 5.04         | 99% $ \pm 9/2\rangle$                                                | $\pm 4.50$            |
| 1158.42                    | 1163.86                       | 0.13  | 0.15  | 9.05  | 8.87         | 97% $ \pm 7/2\rangle$ + 2% $ \pm 3/2\rangle$                         | $\pm 3.45$            |
| 1317.09                    | 1324.68                       | 3.66  | 4.13  | 5.91  | 22.98        | 86% $ \pm 5/2\rangle$ + 9% $ \pm 1/2\rangle$ + 2% $ \mp 3/2\rangle$  | $\pm 2.21$            |
| 1450.04                    | 1454.95                       | 2.15  | 5.36  | 11.36 | 89.89        | 70% $ \pm 3/2\rangle$ + 19% $ \mp 1/2\rangle$ + 8% $ \mp 5/2\rangle$ | $\pm 0.84$            |
| 1628.98                    | 1625.53                       | 0.24  | 0.76  | 18.36 | 89.65        | 66% $ \pm 1/2\rangle$ + 20% $ \mp 3/2\rangle$ + 5% $ \mp 1/2\rangle$ | $\pm 0.10$            |

**Table S14.** Electronic structure of **1-PBE** using higher level methodology.

| Energy (cm <sup>-1</sup> ) | CF Energy (cm <sup>-1</sup> ) | $g_x$ | $g_y$ | $g_z$ | $\theta$ (°) | Wavefunction                                                         | $\langle J_z \rangle$ |
|----------------------------|-------------------------------|-------|-------|-------|--------------|----------------------------------------------------------------------|-----------------------|
| 0.00                       | 0.00                          | 0.00  | 0.00  | 19.89 | --           | 100% $ \pm 15/2\rangle$                                              | $\pm 7.50$            |
| 475.46                     | 481.82                        | 0.00  | 0.00  | 17.03 | 1.99         | 100% $ \pm 13/2\rangle$                                              | $\pm 6.50$            |
| 755.40                     | 752.32                        | 0.00  | 0.00  | 14.39 | 0.75         | 99% $ \pm 11/2\rangle$                                               | $\pm 5.50$            |
| 946.94                     | 946.17                        | 0.02  | 0.02  | 11.78 | 5.29         | 99% $ \pm 9/2\rangle$                                                | $\pm 4.49$            |
| 1114.46                    | 1117.95                       | 0.18  | 0.19  | 9.04  | 8.91         | 97% $ \pm 7/2\rangle$ + 2% $ \pm 3/2\rangle$                         | $\pm 3.44$            |
| 1265.34                    | 1270.23                       | 3.79  | 4.22  | 5.90  | 24.31        | 85% $ \pm 5/2\rangle$ + 10% $ \pm 1/2\rangle$ + 2% $ \mp 3/2\rangle$ | $\pm 2.20$            |
| 1391.21                    | 1394.44                       | 2.11  | 5.21  | 11.44 | 89.88        | 70% $ \pm 3/2\rangle$ + 18% $ \mp 1/2\rangle$ + 8% $ \mp 5/2\rangle$ | $\pm 0.83$            |
| 1559.99                    | 1557.71                       | 0.23  | 0.71  | 18.31 | 89.63        | 65% $ \pm 1/2\rangle$ + 20% $ \mp 3/2\rangle$ + 6% $ \mp 1/2\rangle$ | $\pm 0.10$            |

**Table S15.** Electronic structure of **1-PBE0**.

| Energy (cm <sup>-1</sup> ) | CF Energy (cm <sup>-1</sup> ) | $g_x$ | $g_y$ | $g_z$ | $\theta$ (°) | Wavefunction                                                         | $\langle J_z \rangle$ |
|----------------------------|-------------------------------|-------|-------|-------|--------------|----------------------------------------------------------------------|-----------------------|
| 0.00                       | 0.00                          | 0.00  | 0.00  | 20.00 | --           | 100% $ \pm 15/2\rangle$                                              | $\pm 7.50$            |
| 508.38                     | 519.61                        | 0.00  | 0.00  | 17.05 | 2.07         | 100% $ \pm 13/2\rangle$                                              | $\pm 6.50$            |
| 805.69                     | 800.09                        | 0.00  | 0.00  | 14.42 | 1.13         | 99% $ \pm 11/2\rangle$                                               | $\pm 5.50$            |
| 1001.08                    | 999.64                        | 0.02  | 0.03  | 11.82 | 5.65         | 99% $ \pm 9/2\rangle$                                                | $\pm 4.49$            |
| 1174.73                    | 1181.03                       | 0.10  | 0.14  | 9.07  | 9.40         | 97% $ \pm 7/2\rangle$ + 2% $ \pm 3/2\rangle$                         | $\pm 3.45$            |
| 1339.36                    | 1347.96                       | 3.46  | 3.91  | 5.93  | 19.90        | 87% $ \pm 5/2\rangle$ + 9% $ \pm 1/2\rangle$ + 2% $ \mp 3/2\rangle$  | $\pm 2.24$            |
| 1480.04                    | 1485.07                       | 2.25  | 5.48  | 11.05 | 89.73        | 71% $ \pm 3/2\rangle$ + 18% $ \mp 1/2\rangle$ + 7% $ \mp 5/2\rangle$ | $\pm 0.88$            |
| 1659.86                    | 1656.15                       | 0.28  | 0.94  | 18.22 | 89.83        | 69% $ \pm 1/2\rangle$ + 20% $ \mp 3/2\rangle$ + 3% $ \mp 1/2\rangle$ | $\pm 0.11$            |

**Table S16.** Electronic structure of **1-PBE0** using higher level methodology.

| Energy (cm <sup>-1</sup> ) | CF Energy (cm <sup>-1</sup> ) | $g_x$ | $g_y$ | $g_z$ | $\theta$ (°) | Wavefunction                                                         | $\langle J_z \rangle$ |
|----------------------------|-------------------------------|-------|-------|-------|--------------|----------------------------------------------------------------------|-----------------------|
| 0.00                       | 0.00                          | 0.00  | 0.00  | 19.90 | --           | 100% $ \pm 15/2\rangle$                                              | $\pm 7.50$            |
| 494.97                     | 502.14                        | 0.00  | 0.00  | 17.02 | 2.14         | 100% $ \pm 13/2\rangle$                                              | $\pm 6.50$            |
| 775.54                     | 771.88                        | 0.00  | 0.00  | 14.39 | 0.83         | 99% $ \pm 11/2\rangle$                                               | $\pm 5.50$            |
| 962.96                     | 962.16                        | 0.02  | 0.02  | 11.80 | 5.92         | 99% $ \pm 9/2\rangle$                                                | $\pm 4.49$            |
| 1130.25                    | 1134.28                       | 0.14  | 0.17  | 9.06  | 9.46         | 97% $ \pm 7/2\rangle$ + 2% $ \pm 3/2\rangle$                         | $\pm 3.44$            |
| 1286.92                    | 1292.43                       | 3.58  | 4.01  | 5.92  | 20.89        | 86% $ \pm 5/2\rangle$ + 9% $ \pm 1/2\rangle$ + 2% $ \mp 3/2\rangle$  | $\pm 2.23$            |
| 1419.87                    | 1423.15                       | 2.22  | 5.34  | 11.14 | 89.75        | 71% $ \pm 3/2\rangle$ + 18% $ \mp 1/2\rangle$ + 7% $ \mp 5/2\rangle$ | $\pm 0.87$            |
| 1589.24                    | 1586.81                       | 0.27  | 0.88  | 18.18 | 89.82        | 68% $ \pm 1/2\rangle$ + 20% $ \mp 3/2\rangle$ + 4% $ \mp 1/2\rangle$ | $\pm 0.11$            |

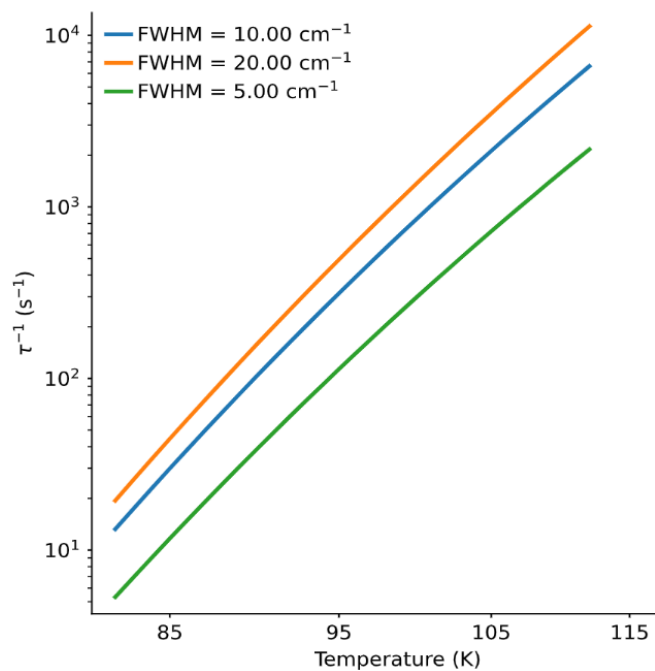

**Figure S27.** Calculated relaxation rates of **1-PBE** with fixed FWHM linewidths of 5  $\text{cm}^{-1}$  (green), 10  $\text{cm}^{-1}$  (blue) and 20  $\text{cm}^{-1}$  (orange) in the temperature range of 82–112 K.

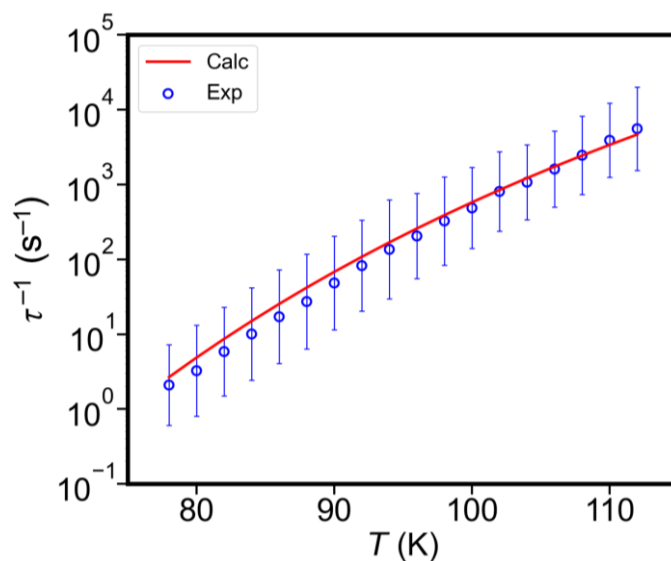

**Figure S28.** Temperature dependence of calculated relaxation rates for **1-PBE0** (red line, FWHM = 10  $\text{cm}^{-1}$ ) and experimental relaxation rates for **1** (blue symbols). Error bars are  $1\sigma$  estimated standard deviations from the generalized Debye model.<sup>12</sup>

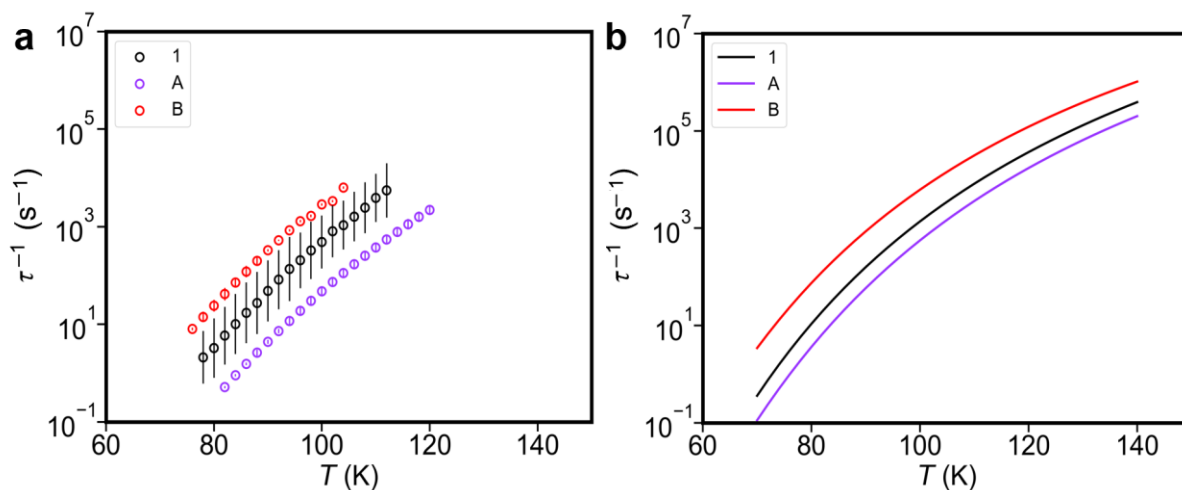

**Figure S29.** Temperature dependence of (a) experimental and (b) calculated relaxation rates for the **1-PBE** model (black),  $[\text{Dy}(\text{Cp}^{\text{iPr}5})(\text{Cp}^{\text{Me}5})]^+$  (**A**; purple), and  $[\text{Dy}(\text{Cp}^{\text{iPr}4})_2]^+$  (**B**; red). Calculations were all performed using a consistent methodology as for **1-PBE** with  $\text{FWHM} = 10 \text{ cm}^{-1}$ .

**Table S17.** Mode-weighted comparison of **1-PBE** with  $[\text{Dy}(\text{Cp}^{\text{iPr}5})(\text{Cp}^{\text{Me}5})]^+$  (**A**) performed at 100 K with  $\text{FWHM} = 10 \text{ cm}^{-1}$ .

| $\langle \bar{H}_{\text{SP}} \rangle$ | $\langle \bar{Q} \rangle$ | $\langle \bar{\rho} \rangle$ | $\langle \bar{n} \rangle$ | $\tau^{-1} (\text{s}^{-1})$ | $\tau^{-1}/\tau^{-1}_{\mathbf{1}}$ |
|---------------------------------------|---------------------------|------------------------------|---------------------------|-----------------------------|------------------------------------|
| <b>A</b>                              | <b>1-PBE</b>              | <b>1-PBE</b>                 | <b>1-PBE</b>              | $3.91 \times 10^2$          | 0.45                               |
| <b>1-PBE</b>                          | <b>1-PBE</b>              | <b>A</b>                     | <b>1-PBE</b>              | $8.49 \times 10^2$          | 0.98                               |
| <b>1-PBE</b>                          | <b>1-PBE</b>              | <b>1-PBE</b>                 | <b>1-PBE</b>              | $8.64 \times 10^2$          | 1.00                               |
| <b>1-PBE</b>                          | <b>1-PBE</b>              | <b>1-PBE</b>                 | <b>A</b>                  | $8.81 \times 10^2$          | 1.02                               |
| <b>1-PBE</b>                          | <b>A</b>                  | <b>1-PBE</b>                 | <b>1-PBE</b>              | $1.22 \times 10^3$          | 1.41                               |
| $\langle \bar{H}_{\text{SP}} \rangle$ | $\langle \bar{Q} \rangle$ | $\langle \bar{\rho} \rangle$ | $\langle \bar{n} \rangle$ | $\tau^{-1} (\text{s}^{-1})$ | $\tau^{-1}/\tau^{-1}_{\mathbf{A}}$ |
| <b>A</b>                              | <b>A</b>                  | <b>1-PBE</b>                 | <b>A</b>                  | $1.21 \times 10^2$          | 0.22                               |
| <b>A</b>                              | <b>A</b>                  | <b>A</b>                     | <b>1-PBE</b>              | $3.40 \times 10^2$          | 0.61                               |
| <b>A</b>                              | <b>A</b>                  | <b>A</b>                     | <b>A</b>                  | $5.61 \times 10^2$          | 1.00                               |
| <b>A</b>                              | <b>1-PBE</b>              | <b>A</b>                     | <b>A</b>                  | $5.91 \times 10^2$          | 1.05                               |
| <b>1-PBE</b>                          | <b>A</b>                  | <b>A</b>                     | <b>A</b>                  | $2.84 \times 10^3$          | 5.06                               |

**Table S18.** Mode-weighted comparison of **1-PBE** with  $[\text{Dy}(\text{Cp}^{\text{iPr4}})_2]^+$  (**B**), performed at 100 K with FWHM = 10 cm<sup>-1</sup>.

| $\langle \bar{H}_{\text{SP}} \rangle$ | $\langle \bar{Q} \rangle$ | $\langle \bar{\rho} \rangle$ | $\langle \bar{n} \rangle$ | $\tau^{-1}$ (s <sup>-1</sup> ) | $\tau^{-1}/\tau^{-1}_{\mathbf{1}}$ |
|---------------------------------------|---------------------------|------------------------------|---------------------------|--------------------------------|------------------------------------|
| <b>1-PBE</b>                          | <b>1-PBE</b>              | <b>1-PBE</b>                 | <b>B</b>                  | $6.64 \times 10^2$             | 0.77                               |
| <b>1-PBE</b>                          | <b>1-PBE</b>              | <b>1-PBE</b>                 | <b>1-PBE</b>              | $8.64 \times 10^2$             | 1.00                               |
| <b>1-PBE</b>                          | <b>1-PBE</b>              | <b>B</b>                     | <b>1-PBE</b>              | $1.02 \times 10^3$             | 1.18                               |
| <b>B</b>                              | <b>1-PBE</b>              | <b>1-PBE</b>                 | <b>1-PBE</b>              | $1.04 \times 10^3$             | 1.20                               |
| <b>1-PBE</b>                          | <b>B</b>                  | <b>1-PBE</b>                 | <b>1-PBE</b>              | $8.27 \times 10^3$             | 9.57                               |
| $\langle \bar{H}_{\text{SP}} \rangle$ | $\langle \bar{Q} \rangle$ | $\langle \bar{\rho} \rangle$ | $\langle \bar{n} \rangle$ | $\tau^{-1}$ (s <sup>-1</sup> ) | $\tau^{-1}/\tau^{-1}_{\mathbf{B}}$ |
| <b>B</b>                              | <b>1-PBE</b>              | <b>B</b>                     | <b>B</b>                  | $4.16 \times 10^2$             | 0.07                               |
| <b>B</b>                              | <b>B</b>                  | <b>1-PBE</b>                 | <b>B</b>                  | $3.04 \times 10^3$             | 0.49                               |
| <b>B</b>                              | <b>B</b>                  | <b>B</b>                     | <b>1-PBE</b>              | $4.70 \times 10^3$             | 0.76                               |
| <b>B</b>                              | <b>B</b>                  | <b>B</b>                     | <b>B</b>                  | $6.17 \times 10^3$             | 1.00                               |
| <b>1-PBE</b>                          | <b>B</b>                  | <b>B</b>                     | <b>B</b>                  | $1.90 \times 10^4$             | 3.08                               |

**Table S19.** Calculated Löwdin charges for  $[\text{C}_4\text{BPh}_5]^{2-}$ ,  $[\text{Cp}^{\text{iPr5}}]^-$  and  $[\text{Cp}^*]^-$  ligands.

| $[\text{C}_4\text{BPh}_5]^{2-}$                                                     |               |        |               | $[\text{Cp}^{\text{iPr5}}]^-$                                                       |               |                      |               | $[\text{Cp}^*]^-$                                                                     |               |         |               |
|-------------------------------------------------------------------------------------|---------------|--------|---------------|-------------------------------------------------------------------------------------|---------------|----------------------|---------------|---------------------------------------------------------------------------------------|---------------|---------|---------------|
| 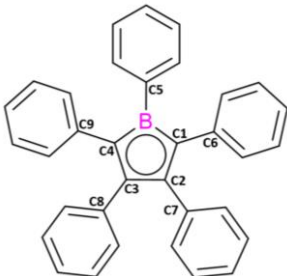 |               |        |               |  |               |                      |               |  |               |         |               |
| Atom                                                                                | Löwdin charge | Group  | Löwdin charge | Atom                                                                                | Löwdin charge | Group                | Löwdin charge | Atom                                                                                  | Löwdin charge | Group   | Löwdin charge |
| B                                                                                   | -0.37         | Ph(C5) | -0.26         | C1                                                                                  | -0.12         | <sup>i</sup> Pr(C6)  | -0.08         | C1                                                                                    | -0.14         | Me(C6)  | -0.07         |
| C1                                                                                  | -0.09         | Ph(C6) | -0.28         | C2                                                                                  | -0.12         | <sup>i</sup> Pr(C7)  | -0.08         | C2                                                                                    | -0.13         | Me(C7)  | -0.06         |
| C2                                                                                  | -0.08         | Ph(C7) | -0.25         | C3                                                                                  | -0.12         | <sup>i</sup> Pr(C8)  | -0.08         | C3                                                                                    | -0.14         | Me(C8)  | -0.06         |
| C3                                                                                  | -0.08         | Ph(C8) | -0.21         | C4                                                                                  | -0.12         | <sup>i</sup> Pr(C9)  | -0.08         | C4                                                                                    | -0.13         | Me(C9)  | -0.07         |
| C4                                                                                  | -0.09         | Ph(C9) | -0.29         | C5                                                                                  | -0.12         | <sup>i</sup> Pr(C10) | -0.08         | C5                                                                                    | -0.14         | Me(C10) | -0.06         |
| <b>C<sub>4</sub>B total</b>                                                         | <b>-0.71</b>  |        |               | <b>C<sub>5</sub> total</b>                                                          | <b>-0.60</b>  |                      |               | <b>C<sub>5</sub> total</b>                                                            | <b>-0.68</b>  |         |               |

**Table S20.** Calculated Löwdin charges for [Cp<sup>ttt</sup>]<sup>-</sup> and [P(C<sup>t</sup>BuCMe)<sub>2</sub>]<sup>-</sup> ligands.

| [Cp <sup>ttt</sup> ] <sup>-</sup>                                                 |               |                     |               | [P(C <sup>t</sup> BuCMe) <sub>2</sub> ] <sup>-</sup>                               |               |                     |               |
|-----------------------------------------------------------------------------------|---------------|---------------------|---------------|------------------------------------------------------------------------------------|---------------|---------------------|---------------|
| 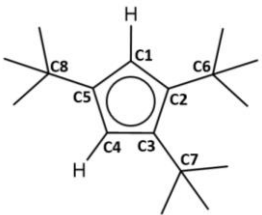 |               |                     |               |  |               |                     |               |
| Atom                                                                              | Löwdin charge | Group               | Löwdin charge | Atom                                                                               | Löwdin charge | Group               | Löwdin charge |
| C1                                                                                | -0.29         | C6- <sup>t</sup> Bu | -0.10         | P                                                                                  | -0.09         | C5- <sup>t</sup> Bu | -0.07         |
| C2                                                                                | -0.12         | C7- <sup>t</sup> Bu | -0.10         | C1                                                                                 | -0.24         | C6-Me               | -0.04         |
| C3                                                                                | -0.12         | C8- <sup>t</sup> Bu | -0.10         | C2                                                                                 | -0.10         | C7-Me               | -0.04         |
| C4                                                                                | -0.28         |                     |               | C3                                                                                 | -0.10         | C8- <sup>t</sup> Bu | -0.07         |
| C5                                                                                | -0.11         |                     |               | C4                                                                                 | -0.24         |                     |               |
| C <sub>5</sub> total                                                              | -0.90         |                     |               | C <sub>4</sub> P total                                                             | -0.77         |                     |               |



#### 4. References

- (1) Herberich, G. E.; Buller, B.; Hessner, B.; Oschmann, W. Derivative Des Borols: II. Pentaphenylborol: Synthese, Reduktion Zum Dianion Und Komplexe von Kobalt Und Platin. *J. Organomet. Chem.* **1980**, *195* (3), 253–259.
- (2) Eisch, J. J.; Galle, J. E.; Kozima, S. The Physical and Chemical Consequences of Cyclic Conjugation in Boracyclopolyenes. The Antiaromatic Character of Pentaarylboroles I. *J. Am. Chem. Soc.* **1986**, *108* (3), 379–385.
- (3) Niedenzu, K.; Dawson, J. W. Boron-Nitrogen Compounds. III.1,2 Aminoboranes, Part 2: The B-N Bond Character in Substituted Aminoboranes. *J. Am. Chem. Soc.* **1960**, *82* (16), 4223–4228.
- (4) Eisch, J. J.; Galle, J. E.; Kozima, S. The Physical and Chemical Consequences of Cyclic Conjugation in Boracyclopolyenes. The Antiaromatic Character of Pentaarylboroles. *J. Am. Chem. Soc.* **1986**, *108* (3), 379–385.
- (5) AXS, B. SAINT and APEX 2 Software for CCD Diffractometers. *SAINT and APEX 2 software for CCD diffractometers*. 2006.
- (6) Sheldrick, G. M. Sadabs. *University of Göttingen, Germany*. 1996.
- (4) Eisch, J. J.; Galle, J. E.; Kozima, S. The Physical and Chemical Consequences of Cyclic Conjugation in Boracyclopolyenes. The Antiaromatic Character of Pentaarylboroles. *J. Am. Chem. Soc.* **1986**, *108* (3), 379–385.
- (8) Sheldrick, G. M. Crystal Structure Refinement with SHELXL. *Acta Crystallographica Section C: Structural Chemistry*. January 2015, pp 3–8.
- (9) Dolomanov, O. V.; Bourhis, L. J.; Gildea, R. J.; Howard, J. A. K.; Puschmann, H. OLEX2: A Complete Structure Solution, Refinement and Analysis Program. *J. Appl. Crystallogr.* **2009**, *42* (2), 339–341.
- (10) Hirshfeld, F. L. Can X-Ray Data Distinguish Bonding Effects from Vibrational Smearing? *Acta Crystallography Section A* **1976**, *32* (2), 239–244.
- (11) Bain, G. A.; Berry, J. F. Diamagnetic Corrections and Pascal's Constants. *J. Chem. Ed.* **2008**, *85* (4), 1–5.
- (12) Hilgar, J. D.; Butts, A. K.; Rinehart, J. D. A Method for Extending AC Susceptometry to Long-Timescale Magnetic Relaxation. *Phys. Chem. Chem. Phys.* **2019**, *21* (40), 22302–22307.
- (13) Reta, D.; Chilton, N. F. Uncertainty Estimates for Magnetic Relaxation Times and Magnetic Relaxation Parameters. *Phys. Chem. Chem. Phys.* **2019**, *21* (42), 23567–23575.
- (14) Frisch, M. J.; Trucks, G. W.; Schlegel, H. B.; Scuseria, G. E.; Robb, M. A.; Cheeseman, J. R.; Scalmani, G.; Barone, V.; Mennucci, B.; Petersson, G. A.; Nakatsuji, H.; Caricato, M.; Li, X.; Hratchian, H. P.; Izmaylov, A. F.; Bloino, J.; Zheng, G.; Sonnenberg, J. L.; Hada, M.; Ehara, M.; Toyota, K.; Fukuda, R.; Hasegawa, J.; Ishida, M.; Nakajima, T.; Honda, Y.; Kitao, O.; Nakai, H.; Vreven, T.; Montgomery, J. A., Jr.; Peralta, J. E.; Ogliaro, F.; Bearpark, M.; Heyd, J. J.; Brothers, E.; Kudin, K. N.; Staroverov, V. N.; Kobayashi, R.; Normand, J.; Raghavachari, K.; Rendell, A.; Burant, J. C.; Iyengar, S. S.; Tomasi, J.; Cossi, M.; Rega, N.; Millam, J. M.; Klene, M.; Knox, J. E.; Cross, J. B.; Bakken, V.; Adamo, C.; Jaramillo, J.; Gomperts, R.; Stratmann, R. E.; Yazyev, O.; Austin, A. J.; Cammi, R.; Pomelli, C.; Ochterski, J. W.; Martin, R. L.; Morokuma, K.; Zakrzewski, V. G.; Voth, G. A.; Salvador, P.; Dannenberg, J. J.; Dapprich, S.; Daniels, A. D.; Farkas, Ö.; Foresman, J. B.; Ortiz, J. V.; Cioslowski, J.; Fox, D. J. Gaussian, Inc., Wallingford CT, **2009**.
- (15) Löwdin, P. On the Non-Orthogonality Problem Connected with the Use of Atomic Wave Functions in the Theory of Molecules and Crystals. *J. Chem. Phys.* **1950**, *18* (3), 365–375.
- (16) Rassolov, V. A.; Pople, J. A.; Ratner, M. A.; Windus, T. L. 6-31G\* Basis Set for Atoms K through Zn. *J. Chem. Phys.* **1998**, *109* (4), 1223–1229.
- (17) Fdez. Galván, I.; Vacher, M.; Alavi, A.; Angeli, C.; Aquilante, F.; Autschbach, J.; Bao, J. J.; Bokarev, S. I.; Bogdanov, N. A.; Carlson, R. K.; Chibotaru, L. F.; Creutzberg, J.; Dattani, N.; Delcey, M. G.; Dong, S. S.; Dreuw, A.; Freitag, L.; Frutos, L. M.; Gagliardi, L.; Gendron, F.; Giussani, A.; González, L.; Grell, G.; Guo, M.; Hoyer, C. E.; Johansson, M.; Keller, S.; Knecht, S.; Kovačević, G.; Källman, E.; Li Manni, G.; Lundberg, M.; Ma, Y.; Mai, S.; Malhado, J. P.; Malmqvist, P. Å.; Marquetand, P.; Mewes, S. A.; Norell, J.; Olivucci, M.; Oppel, M.; Phung, Q. M.; Pierloot, K.; Plasser, F.; Reiher, M.; Sand, A. M.; Schapiro, I.; Sharma, P.; Stein, C. J.; Sørensen, L. K.; Truhlar, D. G.; Ugandi, M.; Ungur, L.; Valentini, A.;

- Vancoillie, S.; Veryazov, V.; Weser, O.; Wesolowski, T. A.; Widmark, P.-O.; Wouters, S.; Zech, A.; Zobel, J. P.; Lindh, R. OpenMolcas: From Source Code to Insight. *J. Chem. Theory Comput.* **2019**, *15* (11), 5925–5964.
- (18) Roos, B. O.; Lindh, R.; Malmqvist, P.-Å.; Veryazov, V.; Widmark, P.-O. Main Group Atoms and Dimers Studied with a New Relativistic ANO Basis Set. *J. Phys. Chem. A* **2004**, *108* (15), 2851–2858.
- (19) Ungur, L.; Chibotaru, L. F. Ab Initio Crystal Field for Lanthanides. *Chem. Eur. J.* **2017**, *23* (15), 3708–3718.
- (20) Reta, D.; Kragoskow, J. G. C.; Chilton, N. F. Ab Initio Prediction of High-Temperature Magnetic Relaxation Rates in Single-Molecule Magnets. *J. Am. Chem. Soc.* **2021**, *143* (15), 5943–5950.
- (21) Kragoskow, J. G. C.; Marbey, J.; Buch, C. D.; Nehrkor, J.; Ozerov, M.; Piligkos, S.; Hill, S.; Chilton, N. F. Analysis of Vibronic Coupling in a 4f Molecular Magnet with FIRMS. *Nat. Commun.* **2022**, *13* (1), 825.
- (22) Layfield, R. A.; Tong, M.-L.; Day, B. M.; Chen, Y.-C.; Guo, F.-S.; Mansikkamäki, A. Magnetic Hysteresis up to 80 Kelvin in a Dysprosium Metallocene Single-Molecule Magnet. *Science* **2018**, *362* (6421), 1400–1403.
- (23) McClain, K. R.; Gould, C. A.; Chakarawet, K.; Teat, S. J.; Groshens, T. J.; Long, J. R.; Harvey, B. G. High-Temperature Magnetic Blocking and Magneto-Structural Correlations in a Series of Dysprosium(III) Metallocene Single-Molecule Magnets. *Chem. Sci.* **2018**, *9* (45), 8492–8503.
- (24) So, C.-W.; Watanabe, D.; Wakamiya, A.; Yamaguchi, S. Synthesis and Structural Characterization of Pentaarylboroles and Their Dianions. *Organometallics* **2008**, *27* (14), 3496–3501.
